# Supplementary material
Source: publisher figshare collection journal article supplement (https://gsapubs.figshare.com/ndownloader/files/22411620)
Supplement: Supplementary file 1 [file 22411620]

Archive with 7 entries (7 files):
- S1.pdf
- S2.pdf
- S3.pdf
- S4.pdf
- Supplemental material.docx
- TableS1.pdf
- TableS2.xlsx
