# Supplementary material
Source: publisher figshare collection journal article supplement (https://gsapubs.figshare.com/ndownloader/files/22411620)
Supplement: Supplementary file 1 [file 22411620 › Supplemental material.docx]

**Additional Annotated Panorama**

To reduce the overall length and amount of figures in the manuscript, we have included an additional annotated panorama highlighting key geomorphological features within the northeastern field portion of the Rio Grande Gorge in Fig. DR1.

**JSG (UT Austin) Analytical Setup**

Samples analyzed at the JSG employed a similar system and analytical setup as BGC, with some exceptions. Pyroxene aliquots ranging from 66-109 mg were encapsulated in a Tantalum packet and heated under vacuum via a 75 W, 800-990 nm diode laser. Temperature of the packets, monitored with a coaxial optical pyrometer calibrated against a K-type thermocouple, regularly reached >1200°C. All extractions were of 15 minutes duration. Subsequent re-extraction yielded 3He signals indistinguishable from blank. Extracted gas was purified by sequential exposure to a Gamma N300 getter and cryogenic charcoal trap at 40 K, then released into a Thermo Helix SFT noble gas mass spectrometer for analysis. 3He gas amounts were calculated against standard aliquots of 3He from a gas pipette. At the time of publication, the calibration of the JSG 3He pipette is only approximately known and ultimate ages were subsequently calculated by comparison with 23 aliquots of six samples analyzed at BGC (see below).

**Inter-laboratory Comparisons and Normalization**

Comparison of BGC and UT Austin duplicate sample results (i.e. samples RGDN 7, 16, 20, 23, 31, and 34) indicate that UT Austin normalized gas amounts (3He atoms/g) are systematically lower, ranging from ~8-30% lower with an average ~25%. This is likely due to pressure effects on the sensitivity of noble gas mass spectrometers (discussed in detail in Burnard and Farley, 2000 and Mabry et al., 2013) that are typically resolved by using standard gas splits with gas amounts similar to the samples analyzed (Blard et al., 2015). This solution is currently not available at UT Austin. Instead, to account for this systematic inter-laboratory difference and derive accurate exposure ages, we employed an empirical correction based on comparison of measurements at both labs (Fig. DR2). Equation 1 is a York linear regression (York et al., 2004) of data that exhibit a linear relationship over a particular range of concentration (i.e. 7,500,000 to 30,000,000 3He atoms/g). Uncertainties in 3He concentrations were used to estimate the uncertainty in slope and y-intercept for the regression using the methods described in York et al. (2004) and were propagated into the correction results reported in Table 1. After calibration, inter-laboratory comparisons of sample aliquots overlap within 1 sigma with the exception of RGDN31, which overlaps within 2 sigma.

y = (1.060 ± 0.030)x + (2551595.441 ± 393102.179) (1)

**Boulder Sizes and Morphologies**

Measured heights of all boulders sampled and successfully analyzed in this study, along with comments about their morphological features, are available in DRTable1. We also include sample photos for RGDN21 in Fig. DR3, which was removed from our results on the basis of the boulders’ morphology (i.e. lack of extensive fluvial modification, possibility of spalling from local rockfall) and anomalously young age, which may be a result of anomalous erosion/spallation. For a complete record of all sample photos, we refer the reader to the Master’s Thesis of this work (Clow, 2017).

**Probability Density Functions**

The probability density functions that were used to compute the age and error for each terrace level (based on the total cosmogenic 3He datasets for each) can be seen in Fig. DR4.

**Complete List of References for Fig. 10**

Fig. 10 of the manuscript shows ages vs. latitudes of various quantitatively dated geomorphic features in the greater Rocky Mountain region. Where possible all 10Be dates have been recalculated using the recently updated production rate of 4.01 atoms/g/yr (Borchers et al., 2016). A complete list of all the references used in this figure, as well as the updated ages for the geomorphic features, can be found in the uploaded Excel spreadsheet (DRTable2).

REFERENCES CITED

Blard, P.-H., et al., 2015, An inter-laboratory comparison of cosmogenic 3He and

radiogenic 4He in the CRONUS-P pyroxene standard: Quaternary

Geochronology, v. 26, p. 1-19.

Borchers, B., Marrero, S., Balco, G., Caffee, M., Goehring, B., Lifton, N., Nishiizumi,

K., Phillips, F., Schaefer, J., Stone, J., 2016, Geological calibration of spallation

production rates in the CRONUS-Earth project: Quarternary Geochronology, v.

31, p. 188-198, doi: 10.1016/j.quageo.2015.01.009.

Burnard, P. and Farley, K., 2000, Calibration of pressure-dependent sensitivity and

discrimination in Nier-type noble gas ion sources: Geochemistry, Geophysics, Geosystems, v. 1, no. 7.

Clow, T., 2017, Pleistocene to recent geomorphic and incision history of the northern

Rio Grande River Gorge, New Mexico : constraints from field mapping and

cosmogenic 3He surface exposure dating [M.S. Thesis]: University of Texas at

Austin.

Mabry, J., Lan, T., Burnard, P., and Marty, B., 2013, High-precision helium isotope

measurements in air: Journal of Analytical Atomic Spectrometry, v. 28, no. 12, p.

1903-1910.

York, D., Evensen, N.M., Martinez, M.L., and De Basabe Delgado, J., 2004, Unified

equations for the slope, intercept, and standard errors of the best straight line:

American Journal of Physics, v. 72, no. 3, p. 367-375.

**Figure Captions**

Fig. DR1. Panorama of the Rio Grande gorge east wall near the north end of the study area showing northern-most terraces and gorge wall exposures. Pink lines in the lower, annotated version are hiking trails. Rock unit labels (in white) follow those of Figure 2 and 3 with the following additions: Qls(Tsbu?) – Landslide toreva block of Tsbu?; Qls(Tsf?) – Landslide toreva block containing Tsf?; Tsbl a,b,c – Lower Servilleta Basalt subunit a, b, or c (where identifiable); Tss1,2,3 – Sediment/soil horizons between Tsbl subunit a, b, or c.; Tvr – Volcanic deposits of Red River volcano (Pliocene).

Fig. DR2. Comparison of BGC 3He atoms/gram to JSG 3He atoms/gram measurements for replicate samples (RGDN 7, 16, 20, 23, 30, 34). All samples should theoretically fall on the 1:1 line (black line) within error if inter-laboratory measurements are both accurate and precise; JSG measurements are instead systematically lower. Three linear regressions (with uncertainties considered) are calculated using the methods detailed in York et al. (2004) for JSG's measured samples; the York linear regression equation provides the most accurate fit and is used to correct for this underestimation of gas in this study.

Fig. DR3. Sample photos of RGDN 21, which was excluded from our results due to a lack of evidence of extensive fluvial modification, as observed in all other samples. The angularity observed may be a result of local spalling from a rock fall.

Fig. DR4. Probability density functions used to compute the age and error based on cosmogenic 3He datasets for each terrace level measured in this study. The PDFs are calculated using Matlab-based software discussed in Zechar & Frankel, 2009.
