# Supplementary material
Source: publisher figshare collection journal article supplement (https://gsapubs.figshare.com/ndownloader/files/22411620)
Supplement: Supplementary file 1 [file 22411620 › TableS1.pdf]

| Sample (RGDN) | Terrace Level | Height (cm)       | Morphology Comments                                                |
|---------------|---------------|-------------------|--------------------------------------------------------------------|
| 5             | Qt4           | 92                | sculpted, river polished, high aspect ratio                        |
| 7             | Qt4           | 46                | sculpted, river polished                                           |
| 8             | Qt5           | 95                | river polished, spherical, located on top of smaller boulders      |
| 10            | Qt5           | 92                | sculpted, river polished, lichen cover                             |
| 11            | modern river  | various (>100 cm) | sculpted, fluted, smooth modern river samples (n=10)               |
| 12            | Qt4           | 61                | sculpted, river polished                                           |
| 13            | Qt4           | 120               | sculpted, river polished, ovoid                                    |
| 14            | Qt4           | 90                | sculpted, river polished, flat topped                              |
| 15            | Qt4           | 39                | river polished, high aspect ratio, rectangular                     |
| 16            | Qt4           | 83                | river polished, sculpted                                           |
| 17            | Qt2           | 69                | foliated boulder with downstream oriented scouring                 |
| 19            | Qt2           | 87                | sculpted, river polished                                           |
| 20            | Qt6           | 95                | sculpted, river polished, high aspect ratio, flat topped           |
| 21            | Qt6           | 71                | highly angular, sample has dubious origin -- excluded from results |
| 23            | Qt3           | 81                | heavily sculpted, river polished                                   |
| 24            | Qt3           | 46                | sculpted, river polished                                           |
| 26            | Qt4           | 51                | sculpted, rounded, river polished                                  |
| 27            | Qt4           | 83                | river polished, rounded                                            |
| 28            | Qt3           | 74                | river polished, spherical, large pot hole on top of surface        |
| 29            | Qt3           | 94                | river polished, somewhat angular                                   |
| 30            | Qt3           | 71                | sculpted, river polished                                           |
| 31            | Qt4           | 49                | heavily sculpted, river polished                                   |
| 33            | Qt4           | 56                | sculpted, ovoid, river polished                                    |
| 34            | Qt6           | 93                | sculpted, river polished, lichen cover                             |
