# Supplementary material
Source: publisher figshare collection journal article supplement (https://gsapubs.figshare.com/ndownloader/files/22411620)
Supplement: Supplementary file 1 [file 22411620 › TableS2.xlsx]

## Sheet: Sheet1
Rockies Glacial Compilation
						1=fill terrace abandonment, 2= outwash terrace, 3= scoured bedrock, 4= recessional moraine, 5=lake highstand, 6=terminal moraine, 7=other
Study	Location	lat	long	Reported ages	corrected age	error	feature type	notes
this study	RGdN	36.4766	105.734		69000	9800	1	Qt6
this study	RGdN	36.6642	105..687693		25300	3100	1	Qt3
this study	RGdN	36.6664	105.687		29900	4700	1	Qt4
this study	RGdN	36.6626	105.689		36700	9000	1	Qt5
this study	RGdN	36.65	105.694		24300	6700	1	Qt2
Anders, Matt D., et al. "Pleistocene geomorphology and geochronology of eastern Grand Canyon: Linkages of landscape components during climate changes." Quaternary Science Reviews 24.23-24 (2005): 2428-2448.	Nankoweap tributary of Colorado	36.2074	111.902	30000	35400	6000	1	fill-cut terrace, 10Be age
Anders, Matt D., et al. "Pleistocene geomorphology and geochronology of eastern Grand Canyon: Linkages of landscape components during climate changes." Quaternary Science Reviews 24.23-24 (2005): 2428-2448.	M3 Colorado River deposit near Basalt Creek	36.0667	111.853	55000	64900	12000	1	fill-cut terrace, OSL age
Lucchitta, Ivo, et al. "Cyclic aggradation and downcutting, fluvial response to volcanic activity, and calibration of soil-carbonate stages in the western Grand Canyon, Arizona." Quaternary Research 53.1 (2000): 23-33.	Lees Ferry & Eastern Grand Canyon	36.8675	111.595		60000	10000	1	table doesn't say where ages come from
Lucchitta, Ivo, et al. "Cyclic aggradation and downcutting, fluvial response to volcanic activity, and calibration of soil-carbonate stages in the western Grand Canyon, Arizona." Quaternary Research 53.1 (2000): 23-33.	Lees Ferry & Eastern Grand Canyon	36.8675	111.595		80000	15000	1	table doesn't say where ages come from
Cole, James C., et al. "Ages of Quaternary Rio Grande terrace fill deposits, Albuquerque area New Mexico." New Mexico Geology 29.4 (2007): 122-132.	Albuquerque	35.1248	106.694		70000	10000	1	depositional age but close to top of terrace
Schildgen, Taylor, et al. "26Al and 10Be dating of late Pleistocene and Holocene fill terraces: a record of fluvial deposition and incision, Colorado Front Range." Earth Surface Processes and Landforms 27.7 (2002): 773-787.	Front Range CO	40.0024		26500	31270	3200	1
Schildgen, Taylor, et al. "26Al and 10Be dating of late Pleistocene and Holocene fill terraces: a record of fluvial deposition and incision, Colorado Front Range." Earth Surface Processes and Landforms 27.7 (2002): 773-787.	Front Range CO	39.9997	105.39	15850	18703	3200	1
Schildgen, Taylor, et al. "26Al and 10Be dating of late Pleistocene and Holocene fill terraces: a record of fluvial deposition and incision, Colorado Front Range." Earth Surface Processes and Landforms 27.7 (2002): 773-787.	Front Range CO	39		16000	18880	3900	1
Schildgen, Taylor, et al. "26Al and 10Be dating of late Pleistocene and Holocene fill terraces: a record of fluvial deposition and incision, Colorado Front Range." Earth Surface Processes and Landforms 27.7 (2002): 773-787.	Front Range CO	39		11800	13924	3900	1
Repka, James L., Robert S. Anderson, and Robert C. Finkel. "Cosmogenic dating of fluvial terraces, Fremont River, Utah." Earth and Planetary Science Letters 152.1-4 (1997): 59-73.	Fremont River	38.3	110.911	60000	70800	10620	1
Foster, Melissa A., et al. "Dating of river terraces along Lefthand Creek, western High Plains, Colorado, reveals punctuated incision." Geomorphology 295 (2017): 176-190.	Front Range CO	40.135	105.264		40000	3000	1	strath terrace rather than fill
Sharp, Warren D., et al. "Dating fluvial terraces by 230Th/U on pedogenic carbonate, Wind River Basin, Wyoming." Quaternary Research 59.2 (2003): 139-150.	Bull Lake, Wyoming	43.1931	109.108		55000	8600	2	U-series pedogenic carbonate
Guido, Zackry S., Dylan J. Ward, and Robert S. Anderson. "Pacing the post–Last Glacial Maximum demise of the Animas Valley glacier and the San Juan Mountain ice cap, Colorado." Geology 35.8 (2007): 739-742.	Animas River Terrace	37.8868	107.887	19400	22892	3433.8	2	outwash terrace, age correction by 18%
Phillips, Fred M., et al. "Cosmogenic 36Cl and 10Be ages of Quaternary glacial and fluvial deposits of the Wind River Range, Wyoming." Geological Society of America Bulletin109.11 (1997): 1453-1463.	Wind River range, WY	43.729	109.556		20600	3090	2	outwash terrace, 36Cl
Young, Nicolás E., et al. "Assessing climatic and nonclimatic forcing of Pinedale glaciation and deglaciation in the western United States." Geology 39.2 (2011): 171-174.	ARK River upper flood terrace	38.972	106.204	19600	21756	3263.4	2
Young, Nicolás E., et al. "Assessing climatic and nonclimatic forcing of Pinedale glaciation and deglaciation in the western United States." Geology 39.2 (2011): 171-174.	ARK River lower flood terrace	38.983	106.212	17750	19702.5	2955.38	2
Refsnider, Kurt A., et al. "Last glacial maximum climate inferences from cosmogenic dating and glacier modeling of the western Uinta ice field, Uinta Mountains, Utah." Quaternary Research 69.1 (2008): 130-144.; Laabs, Benjamin JC, et al. "Latest Pleistocene glacial chronology of the Uinta Mountains: support for moisture-driven asynchrony of the last deglaciation." Quaternary Science Reviews 28.13…	Bald Mountain	40.69	110.9	14850	16483.5	2472.53	3	scoured bedrock
Licciardi, Joseph M., and Kenneth L. Pierce. "Cosmogenic exposure-age chronologies of Pinedale and Bull Lake glaciations in greater Yellowstone and the Teton Range, USA." Quaternary Science Reviews 27.7-8 (2008): 814-831.	Jenny Lake	43.785	110.83	14300	15873	2380.95	3
Ward, Dylan J., et al. "Numerical modeling of cosmogenic deglaciation records, Front Range and San Juan mountains, Colorado." Journal of Geophysical Research: Earth Surface114.F1 (2009).	Middle boulder creek	39.9978	105.635	13000	14430	2164.5	3
Young, Nicolás E., et al. "Assessing climatic and nonclimatic forcing of Pinedale glaciation and deglaciation in the western United States." Geology 39.2 (2011): 171-174.	Lake Creek CO	39.0659	106.407	13933.3	15466	2319.9	3
Young, Nicolás E., et al. "Assessing climatic and nonclimatic forcing of Pinedale glaciation and deglaciation in the western United States." Geology 39.2 (2011): 171-174.	Clear Creek CO	39.0026	106.339	14100	15651	2347.65	3
Young, Nicolás E., et al. "Assessing climatic and nonclimatic forcing of Pinedale glaciation and deglaciation in the western United States." Geology 39.2 (2011): 171-174.	Pine Creek CO	38.9743	106.251	15400	17094	2564.1	3
Coleman and Pierce, "Weathering rinds on andesitic and basaltic stones as a Quaternary age indicator, Western United States", Geological Survey Professional Paper 1210, 1981 ;1996	mccall idaho	44.9062	116.117		65000	5000	4	weathering-ring thickness, USGS report
Benson, Larry, et al. "New data for late Pleistocene Pinedale alpine glaciation from southwestern Colorado." Quaternary Science Reviews 24.1-2 (2005): 49-65.	Pinedale, Wyoming	42.9428	109.722	19000	22420	3363	4	moraine 10be, age corrected by 18% for lower production rate
Benson, Larry, et al. "New data for late Pleistocene Pinedale alpine glaciation from southwestern Colorado." Quaternary Science Reviews 24.1-2 (2005): 49-65.	Roaring Fork, CO	40.7449	106.56	20000	23600	3540	4	moraine 10be
Benson, Larry, et al. "New data for late Pleistocene Pinedale alpine glaciation from southwestern Colorado." Quaternary Science Reviews 24.1-2 (2005): 49-65.	North St. Vrain	40.3209	105.692	18700	22066	3309.9	4	moraine 10be
Benson, Larry, et al. "New data for late Pleistocene Pinedale alpine glaciation from southwestern Colorado." Quaternary Science Reviews 24.1-2 (2005): 49-65.	Middle Boulder Creek	40.0856	105.647	19750	23305	3495.75	4	moraine 10be
Benson, Larry, et al. "New data for late Pleistocene Pinedale alpine glaciation from southwestern Colorado." Quaternary Science Reviews 24.1-2 (2005): 49-65.	Butler Gulch	39.2519	106.057	19100	22538	3380.7	4	moraine 10be
Benson, Larry, et al. "New data for late Pleistocene Pinedale alpine glaciation from southwestern Colorado." Quaternary Science Reviews 24.1-2 (2005): 49-65.	Continental Reservoir	37.4451	106.709	21200	25016	3752.4	4	moraine 10be
Benson, Larry, et al. "New data for late Pleistocene Pinedale alpine glaciation from southwestern Colorado." Quaternary Science Reviews 24.1-2 (2005): 49-65.	Hogback Mountain	37.2962	106.546	19200	22656	3398.4	4	moraine 10be
Guido, Zackry S., Dylan J. Ward, and Robert S. Anderson. "Pacing the post–Last Glacial Maximum demise of the Animas Valley glacier and the San Juan Mountain ice cap, Colorado." Geology 35.8 (2007): 739-742.	Baker's Bridge	37.4677	107.79	17100	20178	3026.7	4	10be, age corrected by 18% for production rate, glacially polished surface
Guido, Zackry S., Dylan J. Ward, and Robert S. Anderson. "Pacing the post–Last Glacial Maximum demise of the Animas Valley glacier and the San Juan Mountain ice cap, Colorado." Geology 35.8 (2007): 739-742.	Tacoma	37.5602	107.79	14200	16756	2513.4	4	10be, age corrected by 18% for production rate, glacially polished surface
Guido, Zackry S., Dylan J. Ward, and Robert S. Anderson. "Pacing the post–Last Glacial Maximum demise of the Animas Valley glacier and the San Juan Mountain ice cap, Colorado." Geology 35.8 (2007): 739-742.	Needleton	37.6286	107.779	14900	17582	2637.3	4	10be, age corrected by 18% for production rate, glacially polished surface
Guido, Zackry S., Dylan J. Ward, and Robert S. Anderson. "Pacing the post–Last Glacial Maximum demise of the Animas Valley glacier and the San Juan Mountain ice cap, Colorado." Geology 35.8 (2007): 739-742.	Silverton	37.7855	107.669	14100	16638	2495.7	4	10be, age corrected by 18% for production rate, glacially polished surface
Guido, Zackry S., Dylan J. Ward, and Robert S. Anderson. "Pacing the post–Last Glacial Maximum demise of the Animas Valley glacier and the San Juan Mountain ice cap, Colorado." Geology 35.8 (2007): 739-742.	Highland Mary Lake	37.9124	107.581	12300	14514	2177.1	4	10be, age corrected by 18% for production rate, glacially polished surface
Guido, Zackry S., Dylan J. Ward, and Robert S. Anderson. "Pacing the post–Last Glacial Maximum demise of the Animas Valley glacier and the San Juan Mountain ice cap, Colorado." Geology 35.8 (2007): 739-742.	Elk Creek	37.7146	107.54	15100	17818	2672.7	4	10be, age corrected by 18% for production rate, glacially polished surface
Phillips, Fred M., et al. "Cosmogenic 36Cl and 10Be ages of Quaternary glacial and fluvial deposits of the Wind River Range, Wyoming." Geological Society of America Bulletin109.11 (1997): 1453-1463.	Wind River range, WY	43.236	109.083		18766.7	2815	4
Phillips, Fred M., et al. "Cosmogenic 36Cl and 10Be ages of Quaternary glacial and fluvial deposits of the Wind River Range, Wyoming." Geological Society of America Bulletin109.11 (1997): 1453-1463.	Wind River range, WY	43.242	109.081		21550	3232.5	4
Gosse, John C., et al. "Beryllium-10 dating of the duration and retreat of the last Pinedale glacial sequence." Science268.5215 (1995): 1329-1333.	Winder River range, Fremont Lake	42.907	109.837	16000	18880	2832	4
Gosse, John C., et al. "Beryllium-10 dating of the duration and retreat of the last Pinedale glacial sequence." Science268.5215 (1995): 1329-1333.	Winder River range, Fremont Lake	42.907	109.837	16300	19234	2885.1	4
Gosse, John C., et al. "Beryllium-10 dating of the duration and retreat of the last Pinedale glacial sequence." Science268.5215 (1995): 1329-1333.	Winder River range, Fremont Lake	42.907	109.837	15500	18290	2743.5	4
Gosse, John C., et al. "Beryllium-10 dating of the duration and retreat of the last Pinedale glacial sequence." Science268.5215 (1995): 1329-1333.	Winder River range, Fremont Lake	42.933	109.766	15600	18408	2761.2	4
Gosse, John C., et al. "Beryllium-10 dating of the duration and retreat of the last Pinedale glacial sequence." Science268.5215 (1995): 1329-1333.	Winder River range, Fremont Lake	42.933	109.766	16000	18880	2832	4
Licciardi, Joseph M., et al. "Cosmogenic 3He and 10Be chronologies of the late Pinedale northern Yellowstone ice cap, Montana, USA." Geology 29.12 (2001): 1095-1098.	Eightmile	45.3377	110.692	16500	19470	2920.5	4
Licciardi, Joseph M., et al. "Cosmogenic 3He and 10Be chronologies of the late Pinedale northern Yellowstone ice cap, Montana, USA." Geology 29.12 (2001): 1095-1098.	Chico	45.3377	110.692	15700	18526	2778.9	4
Licciardi, Joseph M., et al. "Cosmogenic 3He and 10Be chronologies of the late Pinedale northern Yellowstone ice cap, Montana, USA." Geology 29.12 (2001): 1095-1098.	DF	45.3377	110.692	14000	16520	2478	4
Licciardi, Joseph M., et al. "Cosmogenic 3He and 10Be chronologies of the late Pinedale northern Yellowstone ice cap, Montana, USA." Geology 29.12 (2001): 1095-1098.	F	45.3377	110.692	13700	16166	2424.9	4
Gosse, John C., et al. "Precise cosmogenic 10Be measurements in western North America: Support for a global Younger Dryas cooling event." Geology 23.10 (1995): 877-880.	Titcomb Lakes moraine	43.1	109.6	12787.5	14194.1	2129.12	4
Licciardi, Joseph M., et al. "Variable responses of western US glaciers during the last deglaciation." Geology 32.1 (2004): 81-84.	TTY	45.312	117.193	18628.6	20677.7	3101.66	4
Licciardi, Joseph M., et al. "Variable responses of western US glaciers during the last deglaciation." Geology 32.1 (2004): 81-84.	WTO	45.324	117.222	17383.3	19295.5	2894.32	4
Licciardi, Joseph M., et al. "Variable responses of western US glaciers during the last deglaciation." Geology 32.1 (2004): 81-84.	Glacier lake	45.16	117.283	10214.3	11337.9	1700.68	4
Licciardi, Joseph M., and Kenneth L. Pierce. "Cosmogenic exposure-age chronologies of Pinedale and Bull Lake glaciations in greater Yellowstone and the Teton Range, USA." Quaternary Science Reviews 27.7-8 (2008): 814-831.	Jenny Lake, WY, outer, inner	43.7659	110.71	14560	16161.6	2424.24	4
Licciardi, Joseph M., and Kenneth L. Pierce. "Cosmogenic exposure-age chronologies of Pinedale and Bull Lake glaciations in greater Yellowstone and the Teton Range, USA." Quaternary Science Reviews 27.7-8 (2008): 814-831.	Jenny Lake, WY, inner	43.7808	110.726	13475	14957.3	2243.59	4
Schildgen, T. "Fire and ice: Geomorphic history of Middle Boulder Creek as determined by isotopic dating techniques." CO Front Range [BS thesis]: Williamstown, Massachusetts, Williams College (2000).	Lake Creek CO	39.0697	106.289	19700	21867	3280.05	4
Young, Nicolás E., et al. "Assessing climatic and nonclimatic forcing of Pinedale glaciation and deglaciation in the western United States." Geology 39.2 (2011): 171-174.	Clear Creek CO	39.027	106.269	19500	21645	3246.75	4
Briner, Jason P. "Moraine pebbles and boulders yield indistinguishable 10Be ages: a case study from Colorado, USA." Quaternary Geochronology 4.4 (2009): 299-305.	Pine Creek CO	38.9808	106.232	18333.3	20350	3052.5	4
Bischoff, James L., and Kathleen Cummins. "Wisconsin glaciation of the Sierra Nevada (79,000–15,000 yr BP) as recorded by rock flour in sediments of Owens Lake, California." Quaternary Research 55.1 (2001): 14-24.	Owens Lake	36.4362	117.96		72000	6000	5	rock flower in lake
Kaufman, Darrell S., Steve L. Forman, and Jordon Bright. "Age of the cutler dam alloformation (late pleistocene), Bonneville basin, Utah." Quaternary Research 56.3 (2001): 322-334.	Bonneville Basin	41.8366	112.047		59000	5000	5	deep lake
Cohen, Andrew, et al. "A paleoclimate record for the past 250,000 years from Summer Lake, Oregon, USA: II. Sedimentology, paleontology and geochemistry." Journal of Paleolimnology 24.2 (2000): 151-182.	Summer Lake, Oregon	42.9729	120.778		69500	20000	5	lake highstand
Whitlock, Cathy, et al. "Environmental history and tephrostratigraphy at Carp Lake, southwestern Columbia basin, Washington, USA." Palaeogeography, Palaeoclimatology, Palaeoecology 155.1-2 (2000): 7-29.	Carp Lake Washington	47.1513	122.564		65000	7000	5
Rosenbaum, J. G., and E. E. Larson. "Paleomagnetism of two late Pleistocene lake basins in Colorado: an evaluation of detrital remanent magnetization as a recorder of the geomagnetic field." Journal of Geophysical Research: Solid Earth 88.B12 (1983): 10611-10624.	Devlins Park/ Sawatch Range	39.96	105.409	26000	30680	2300	6	paleoenvinromental
Gosse, John C., et al. "Beryllium-10 dating of the duration and retreat of the last Pinedale glacial sequence." Science268.5215 (1995): 1329-1333.	Winder River range, Fremont Lake	42.907	109.837	19266.7	22734.7	3410.2	6
Gosse, John C., et al. "Beryllium-10 dating of the duration and retreat of the last Pinedale glacial sequence." Science268.5215 (1995): 1329-1333.	Winder River range, Fremont Lake	42.907	109.837	18750	22125	3318.75	6
Gosse, John C., et al. "Beryllium-10 dating of the duration and retreat of the last Pinedale glacial sequence." Science268.5215 (1995): 1329-1333.	Winder River range, Fremont Lake	42.907	109.837	19350	22833	3424.95	6
Refsnider, Kurt A., et al. "Last glacial maximum climate inferences from cosmogenic dating and glacier modeling of the western Uinta ice field, Uinta Mountains, Utah." Quaternary Research 69.1 (2008): 130-144.; Laabs, Benjamin JC, et al. "Latest Pleistocene glacial chronology of the Uinta Mountains: support for moisture-driven asynchrony of the last deglaciation." Quaternary Science Reviews 28.13…	W Uintas, North Fork Provo	40.59	111.09	15950	17704.5	2655.67	6	production rate used was 4.49, so corrected by x %
Licciardi, Joseph M., et al. "Variable responses of western US glaciers during the last deglaciation." Geology 32.1 (2004): 81-84.	Wallowa OR TTO	45.321	117.196	22000	24420	3663	6
Schildgen, T. "Fire and ice: Geomorphic history of Middle Boulder Creek as determined by isotopic dating techniques." CO Front Range [BS thesis]: Williamstown, Massachusetts, Williams College (2000).	Middle boulder creek	40	105.558	19275	21395.3	3209.29	6
Forman, Steven L., et al. "Timing of late Quaternary glaciations in the western United States based on the age of loess on the eastern Snake River Plain, Idaho." Quaternary Research 40.1 (1993): 30-37.	Snake river plain	42	113		70000	10000	7	TL ages on loess
