# Supplementary material
Source: publisher figshare collection journal article supplement (https://gsapubs.figshare.com/ndownloader/files/22411620)

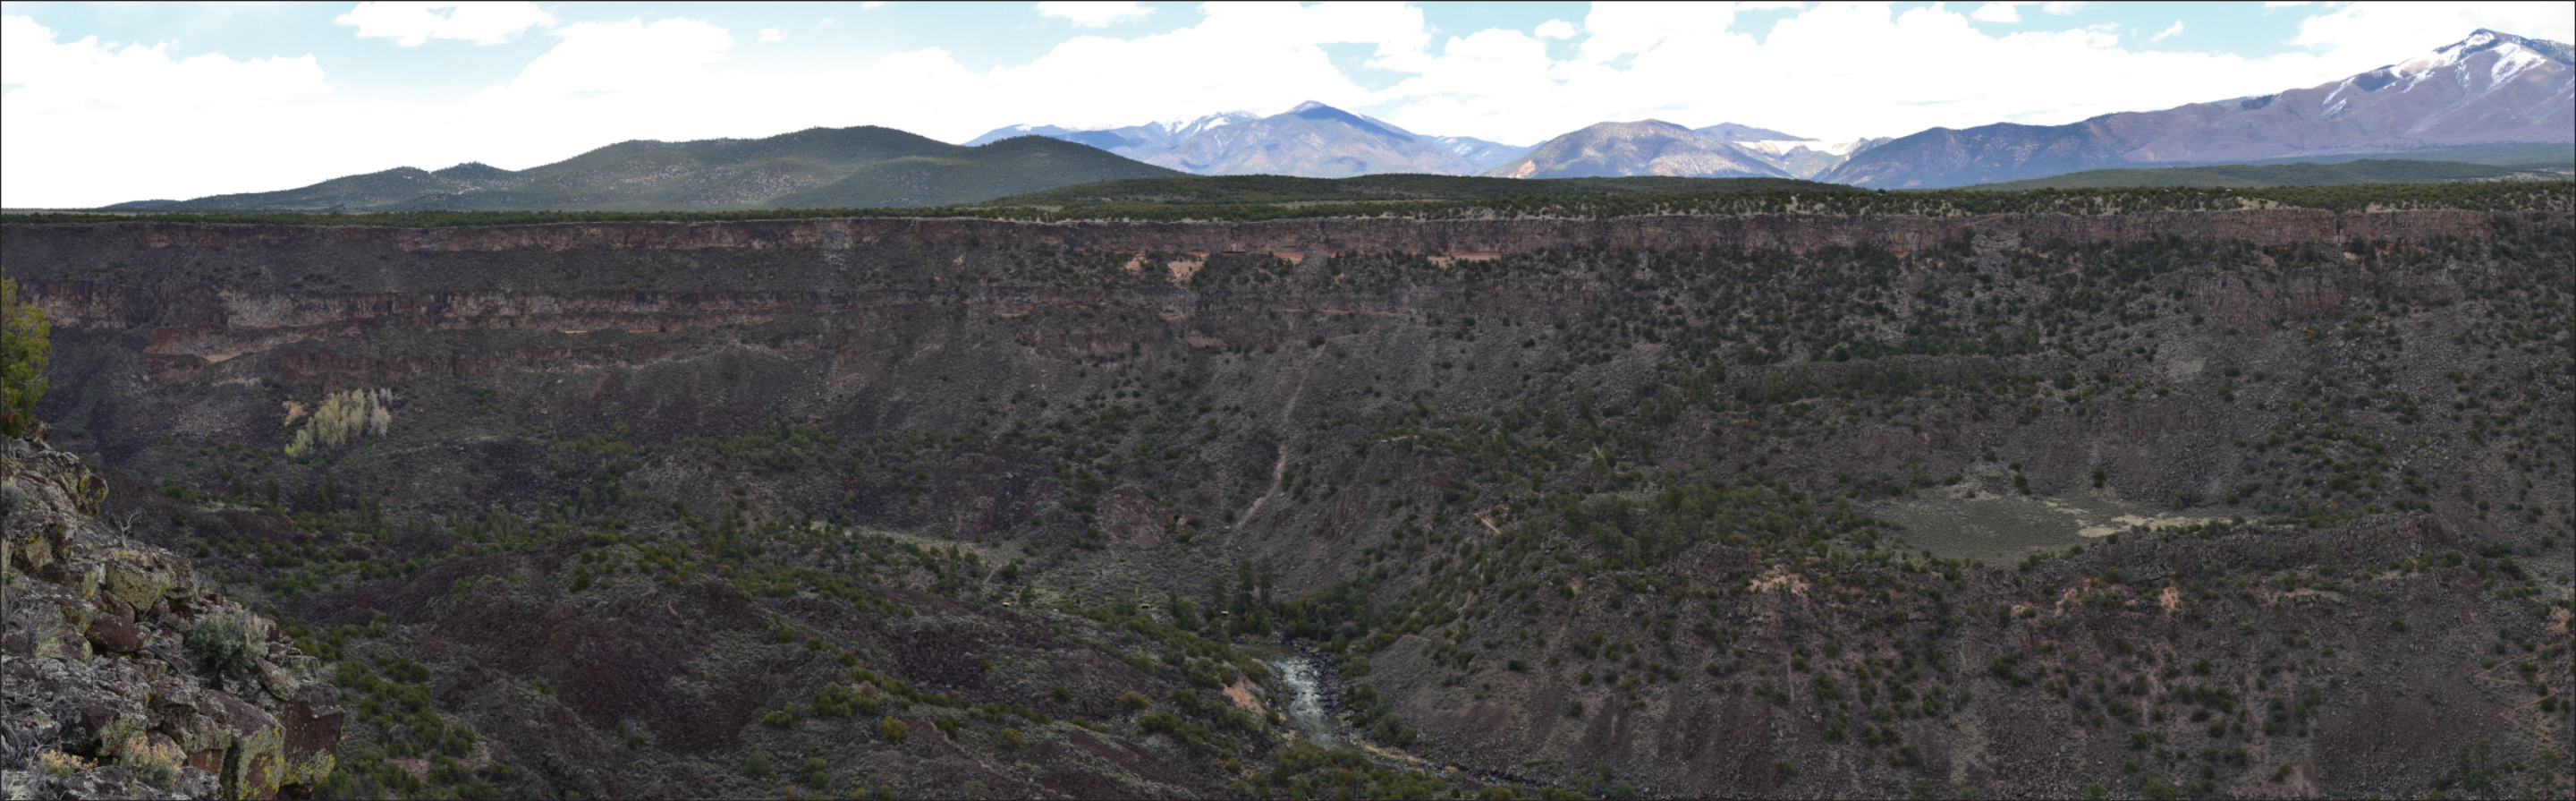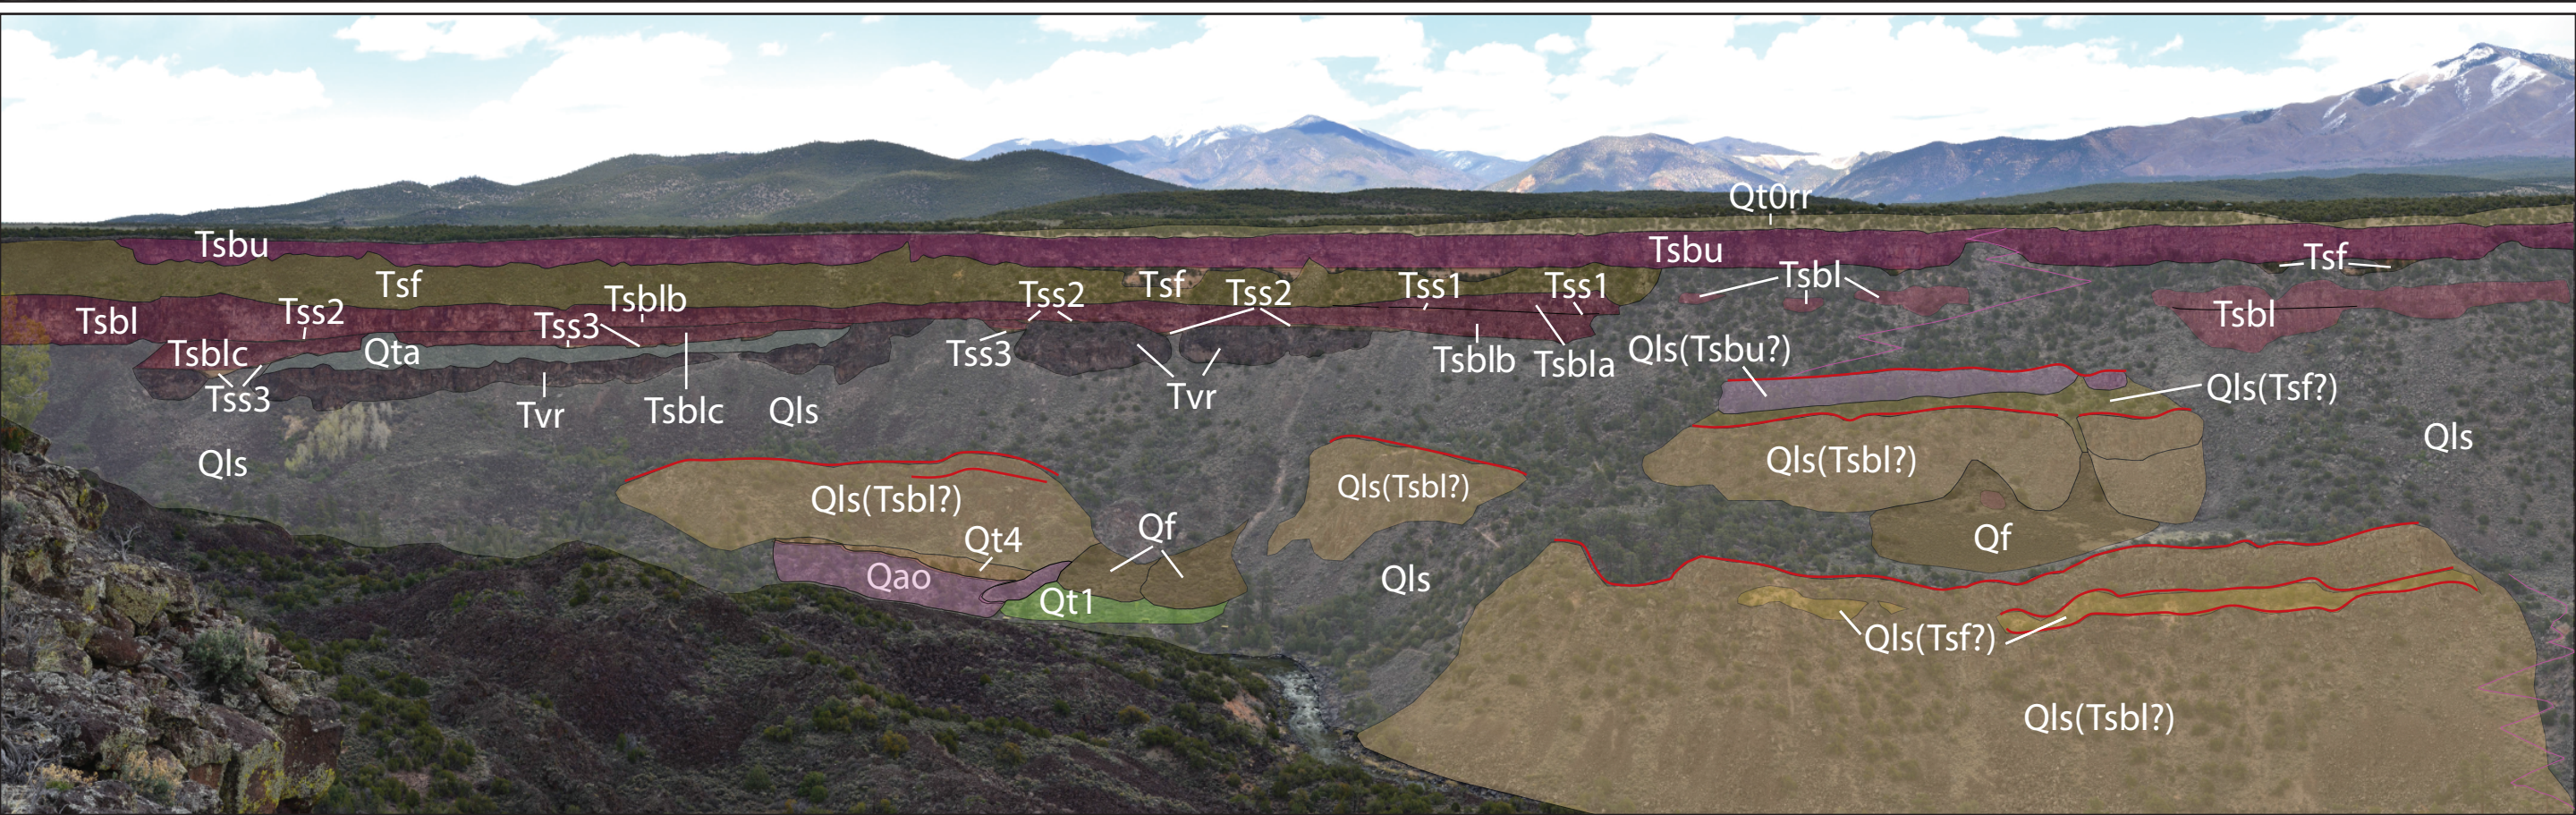

Supplement: Supplementary file 1 [file 22411620 › S1.pdf]

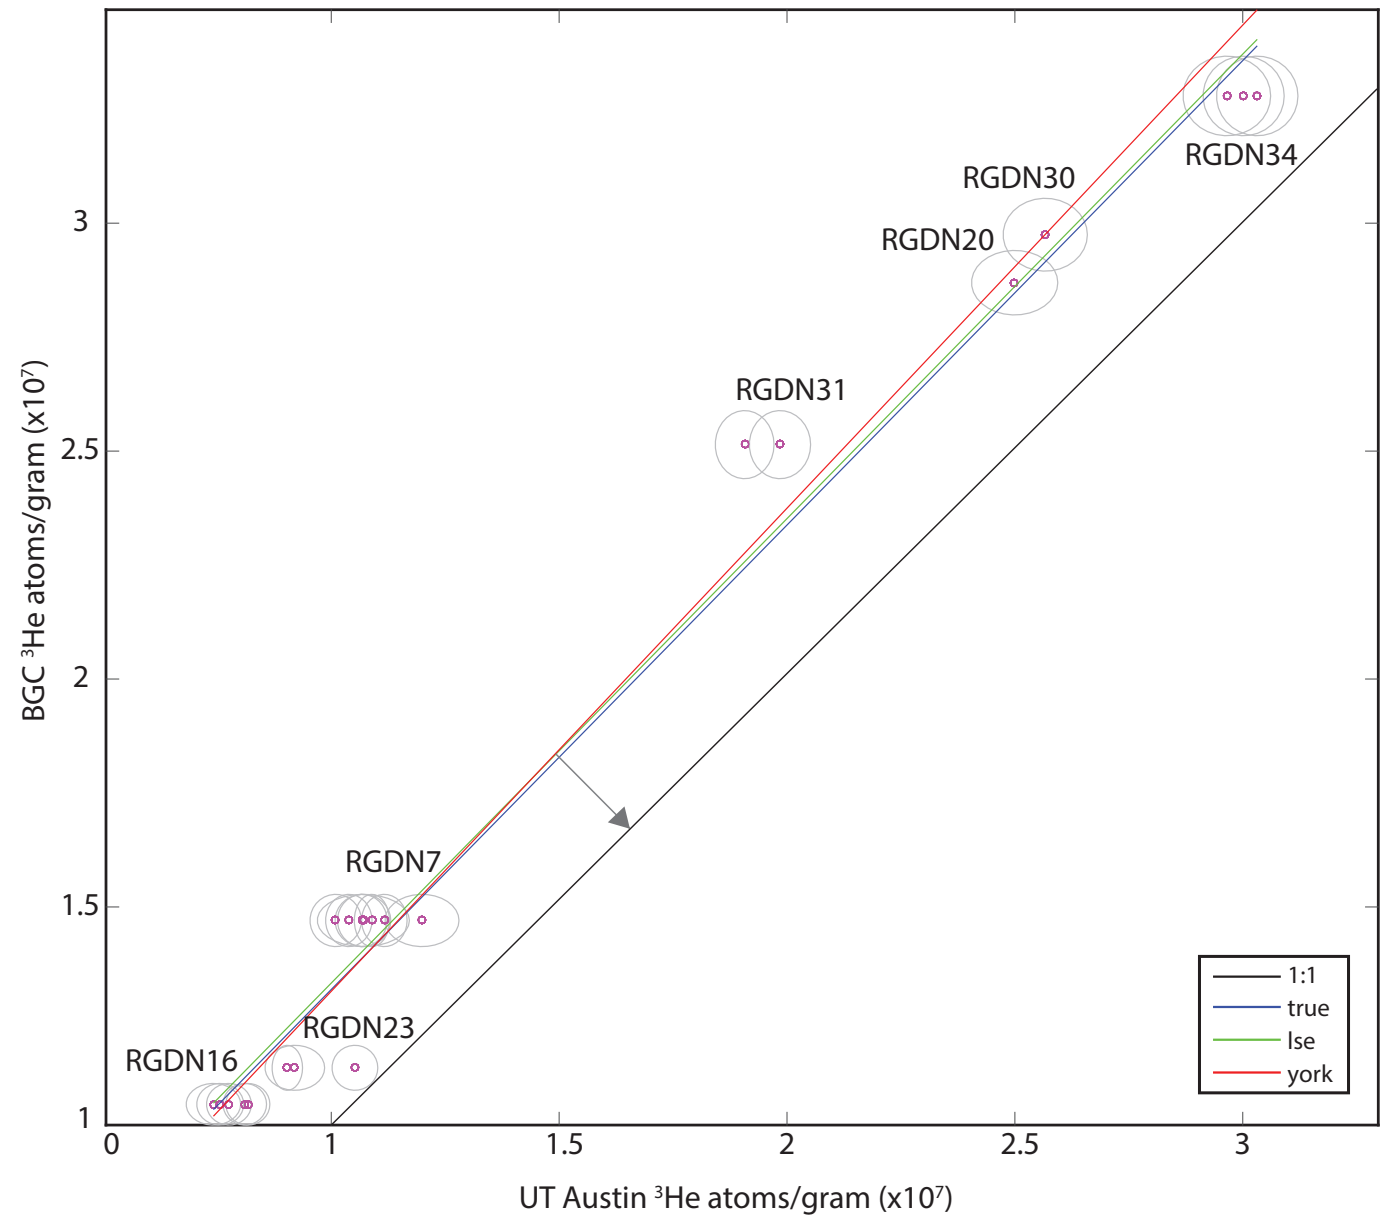

Supplement: Supplementary file 1 [file 22411620 › S2.pdf]

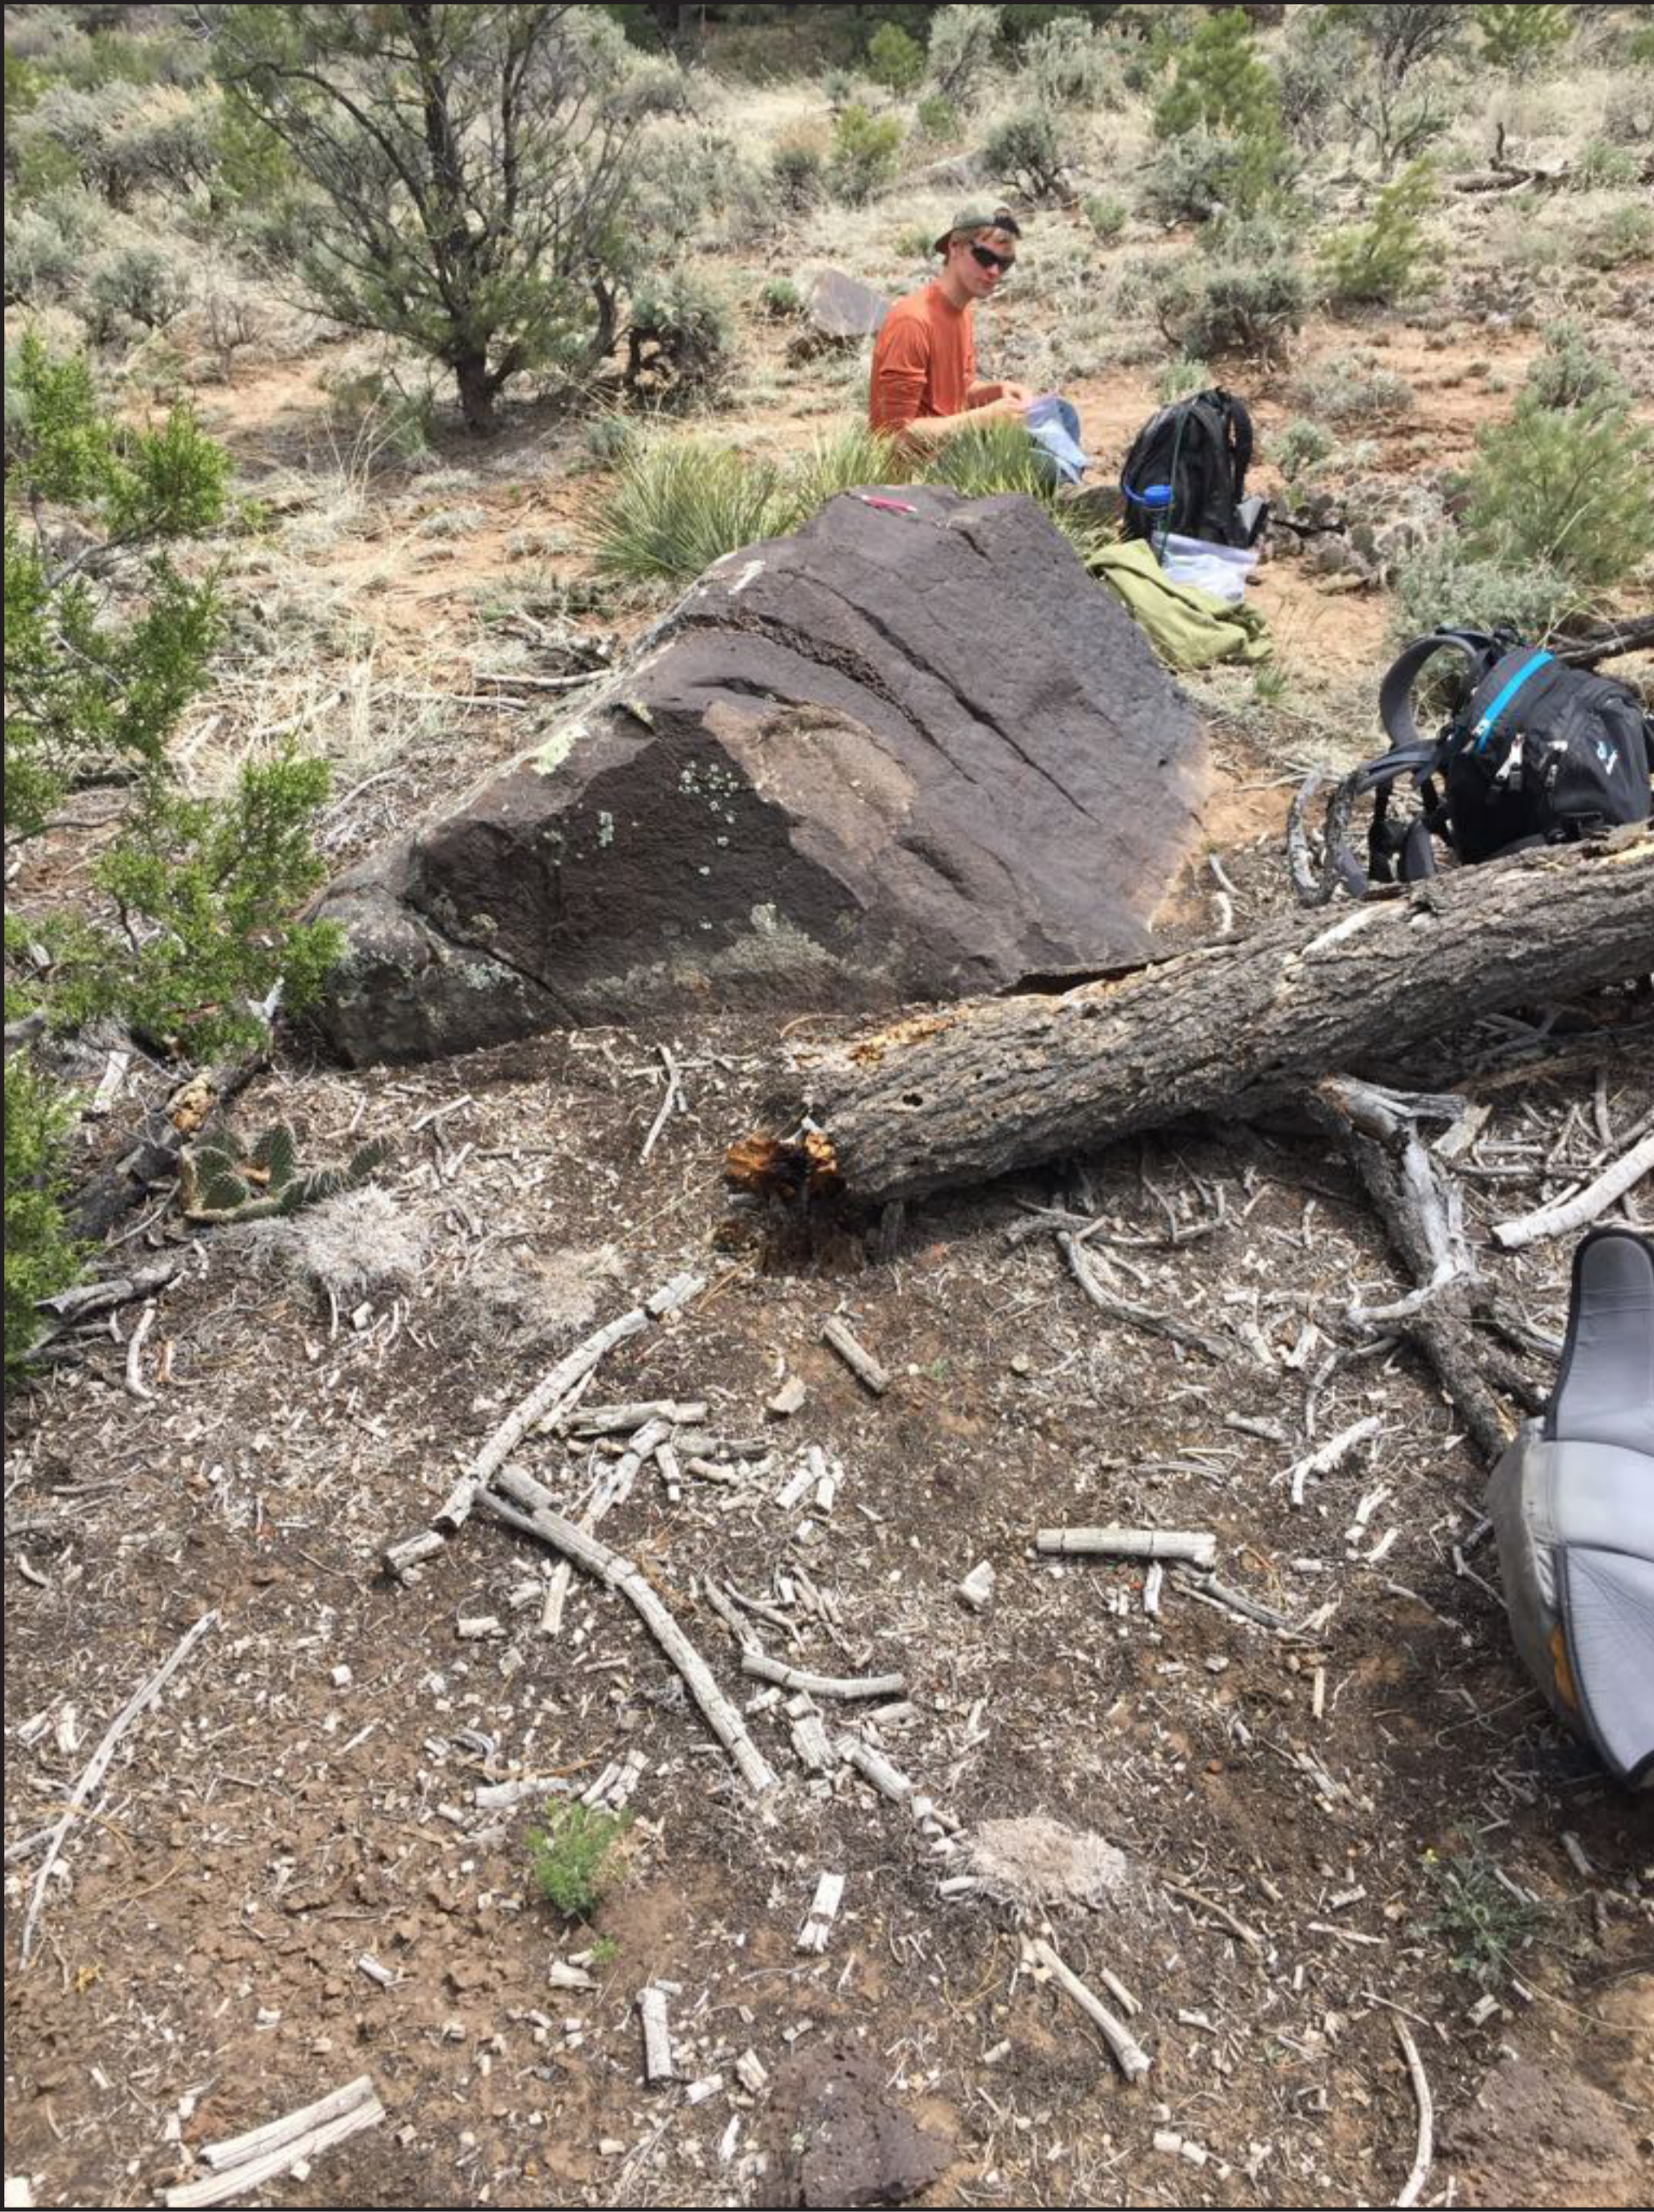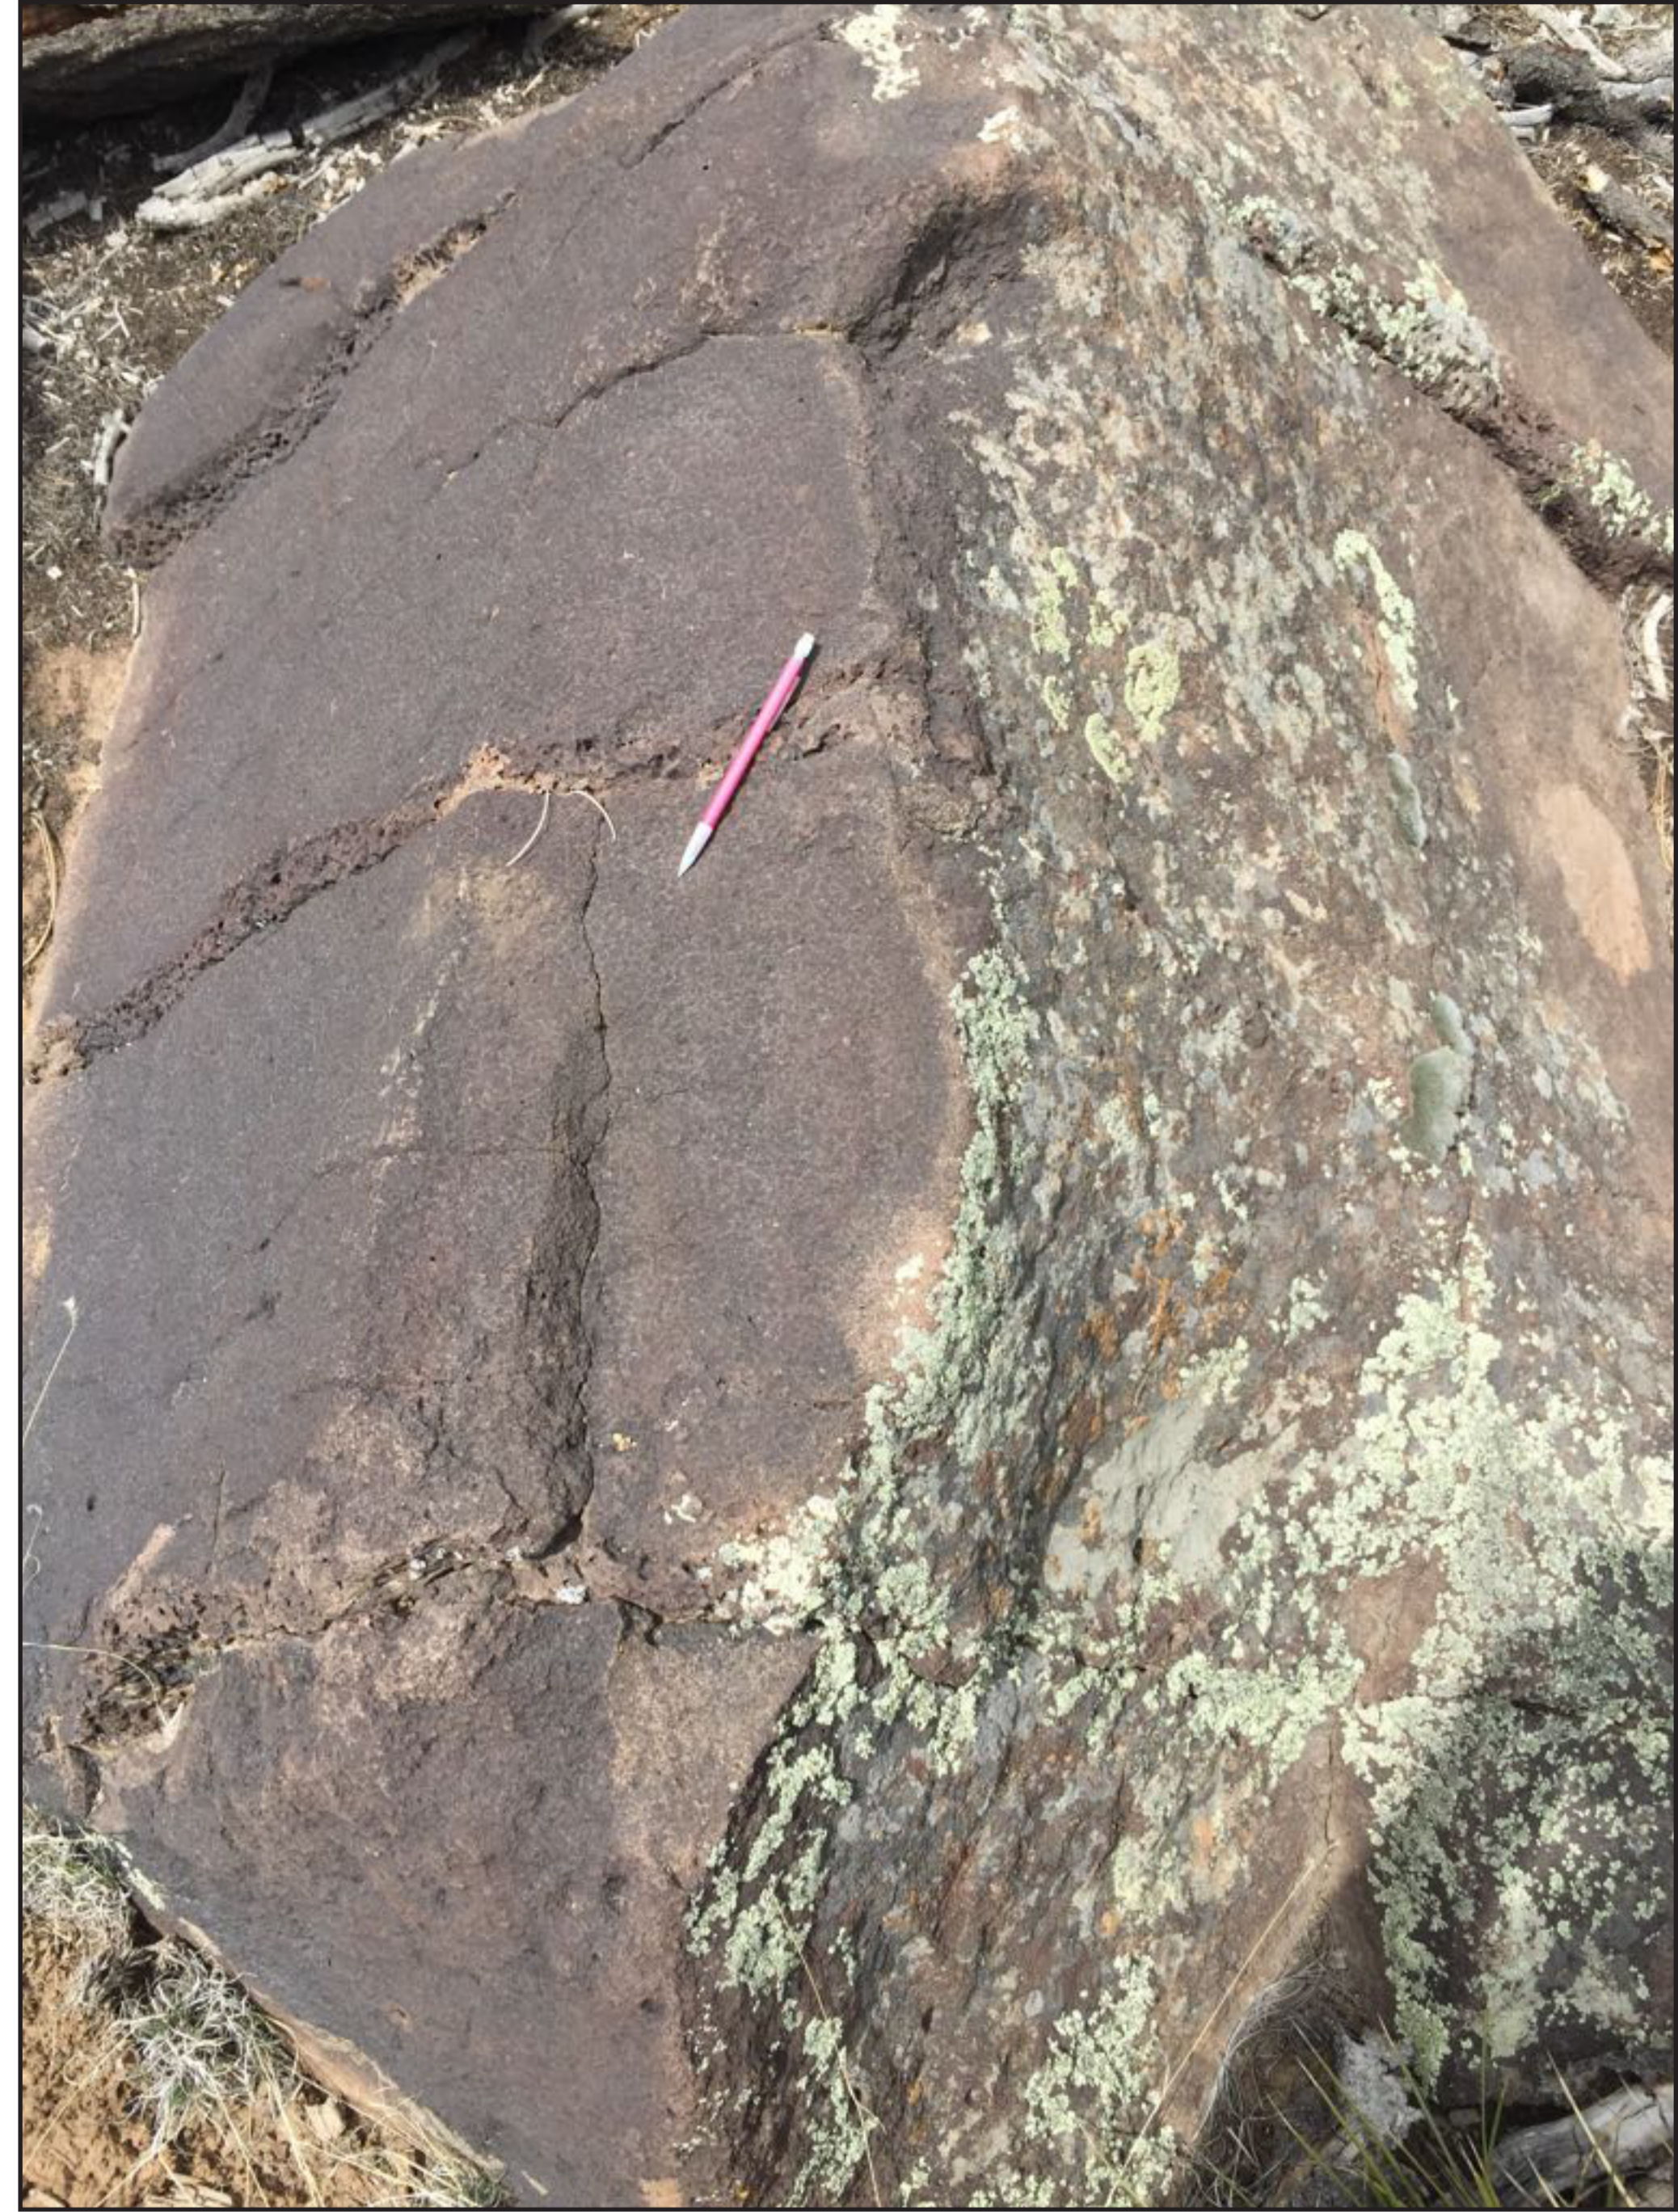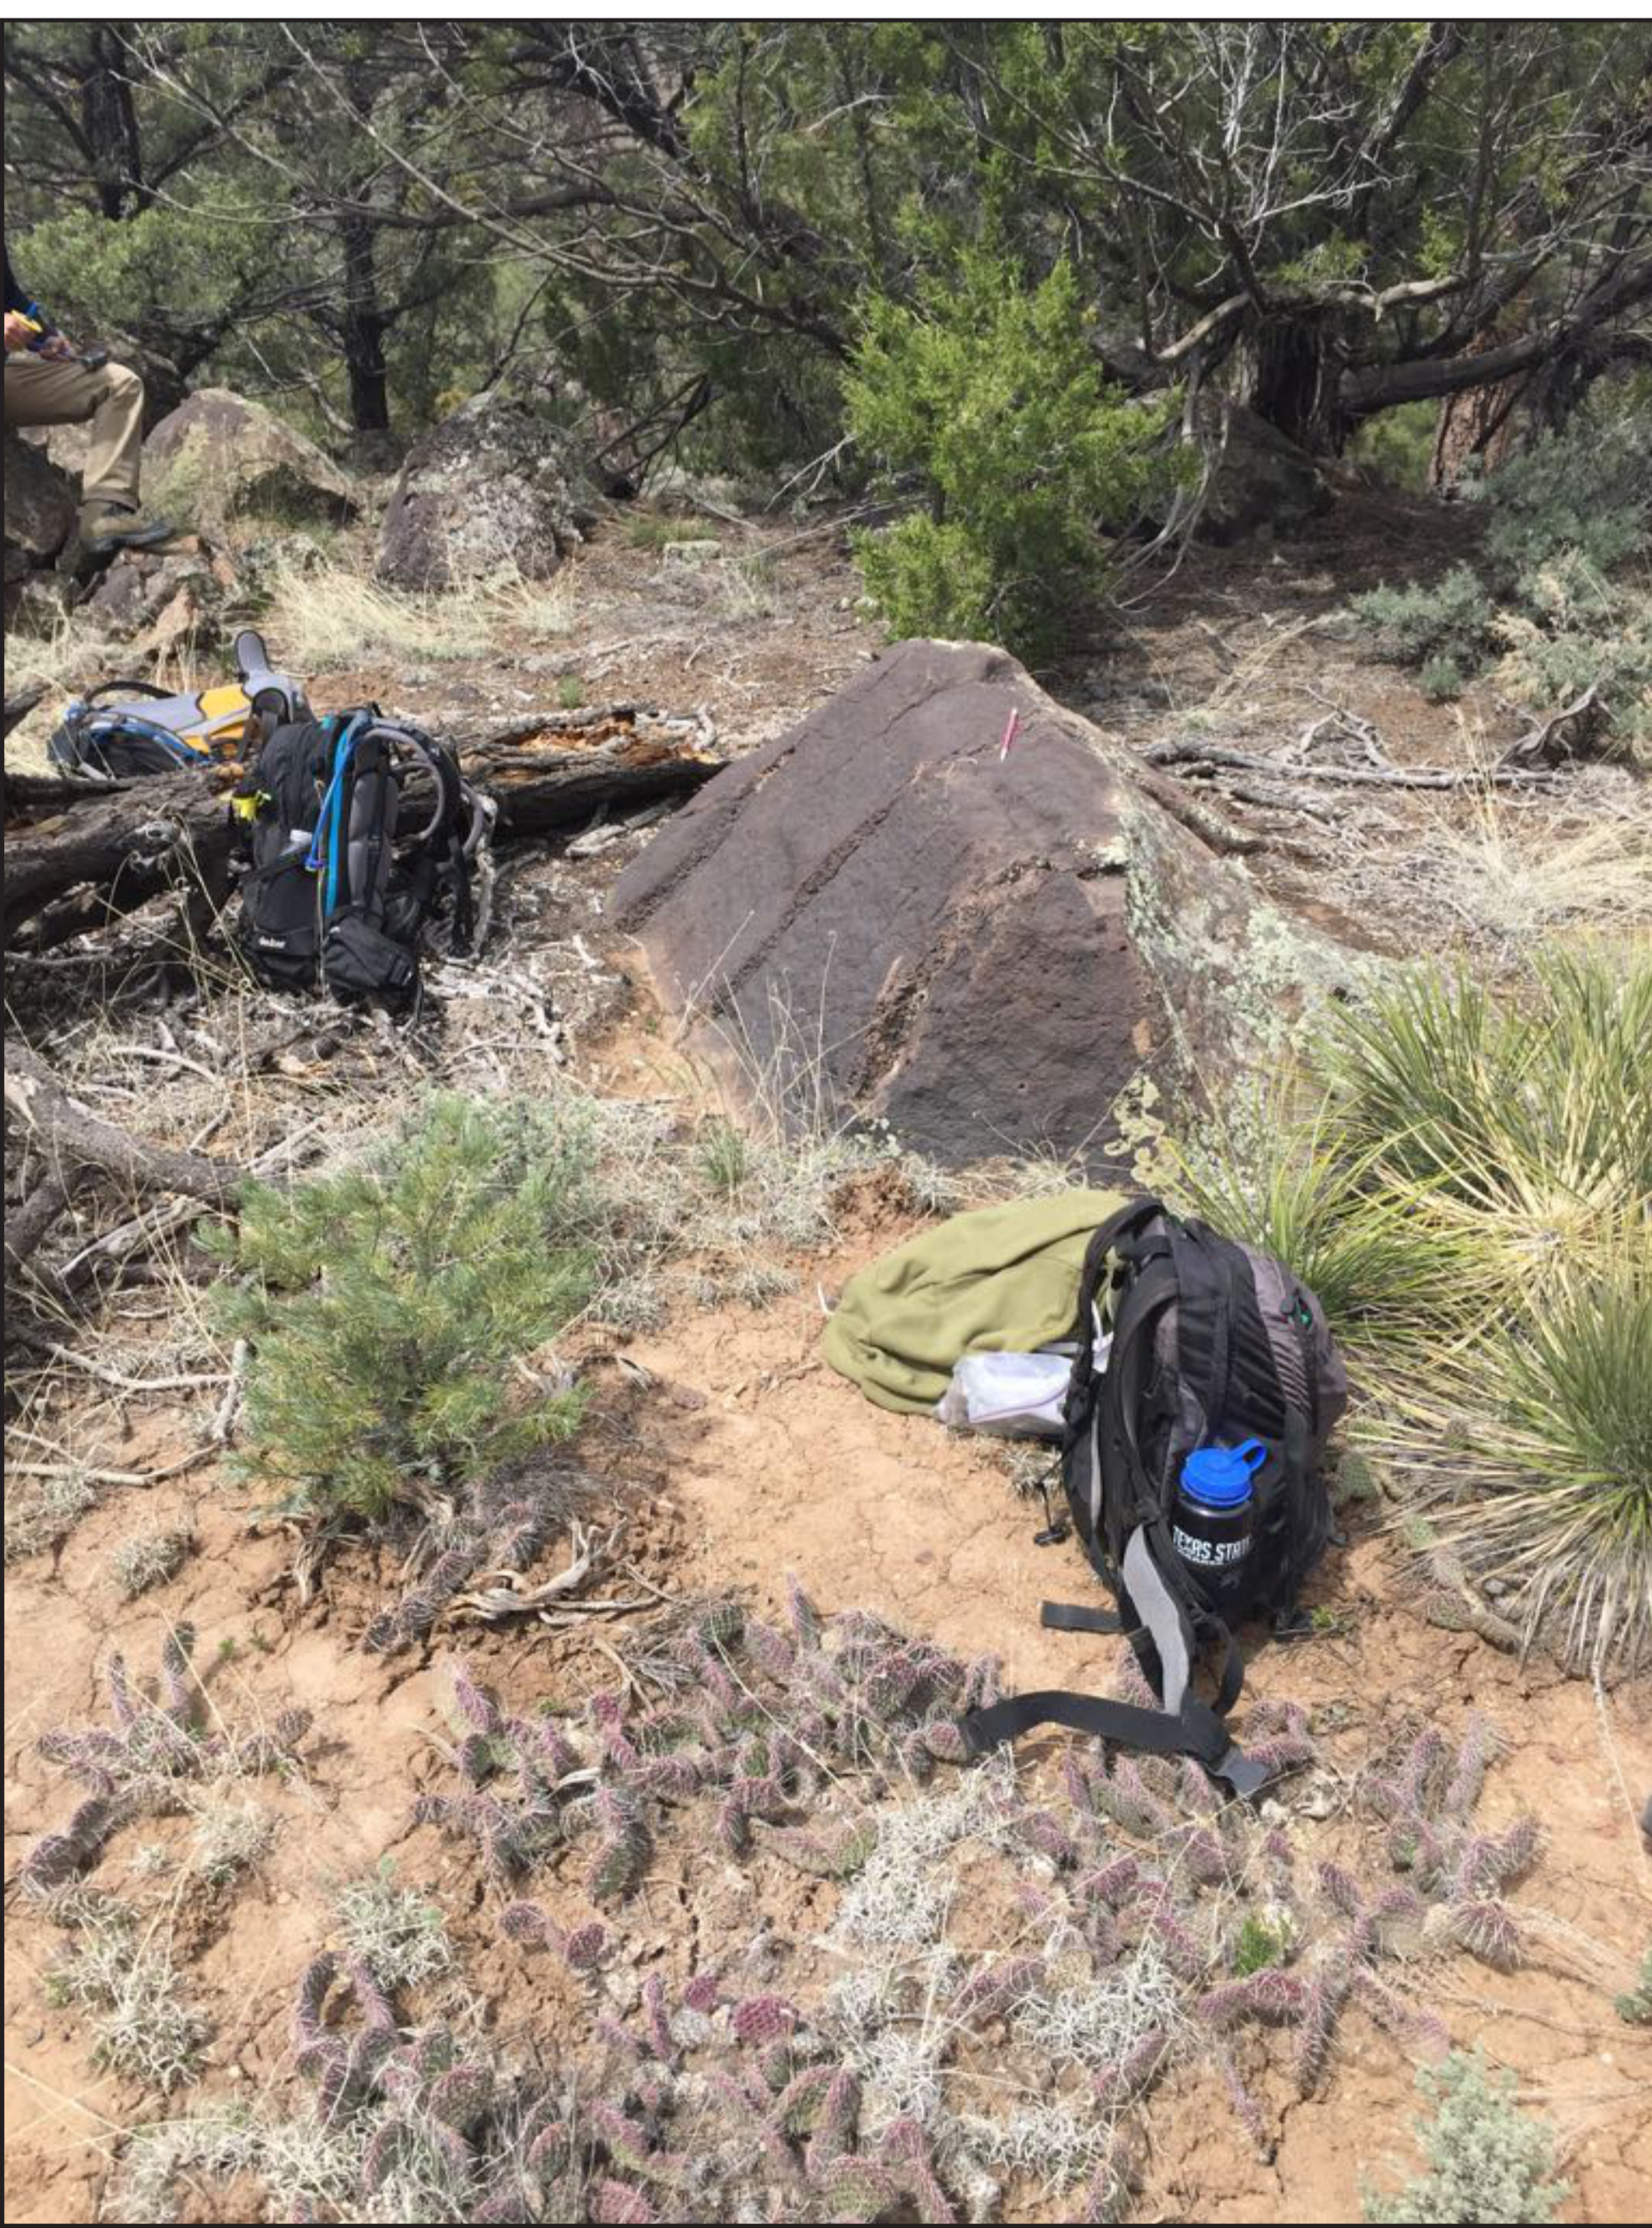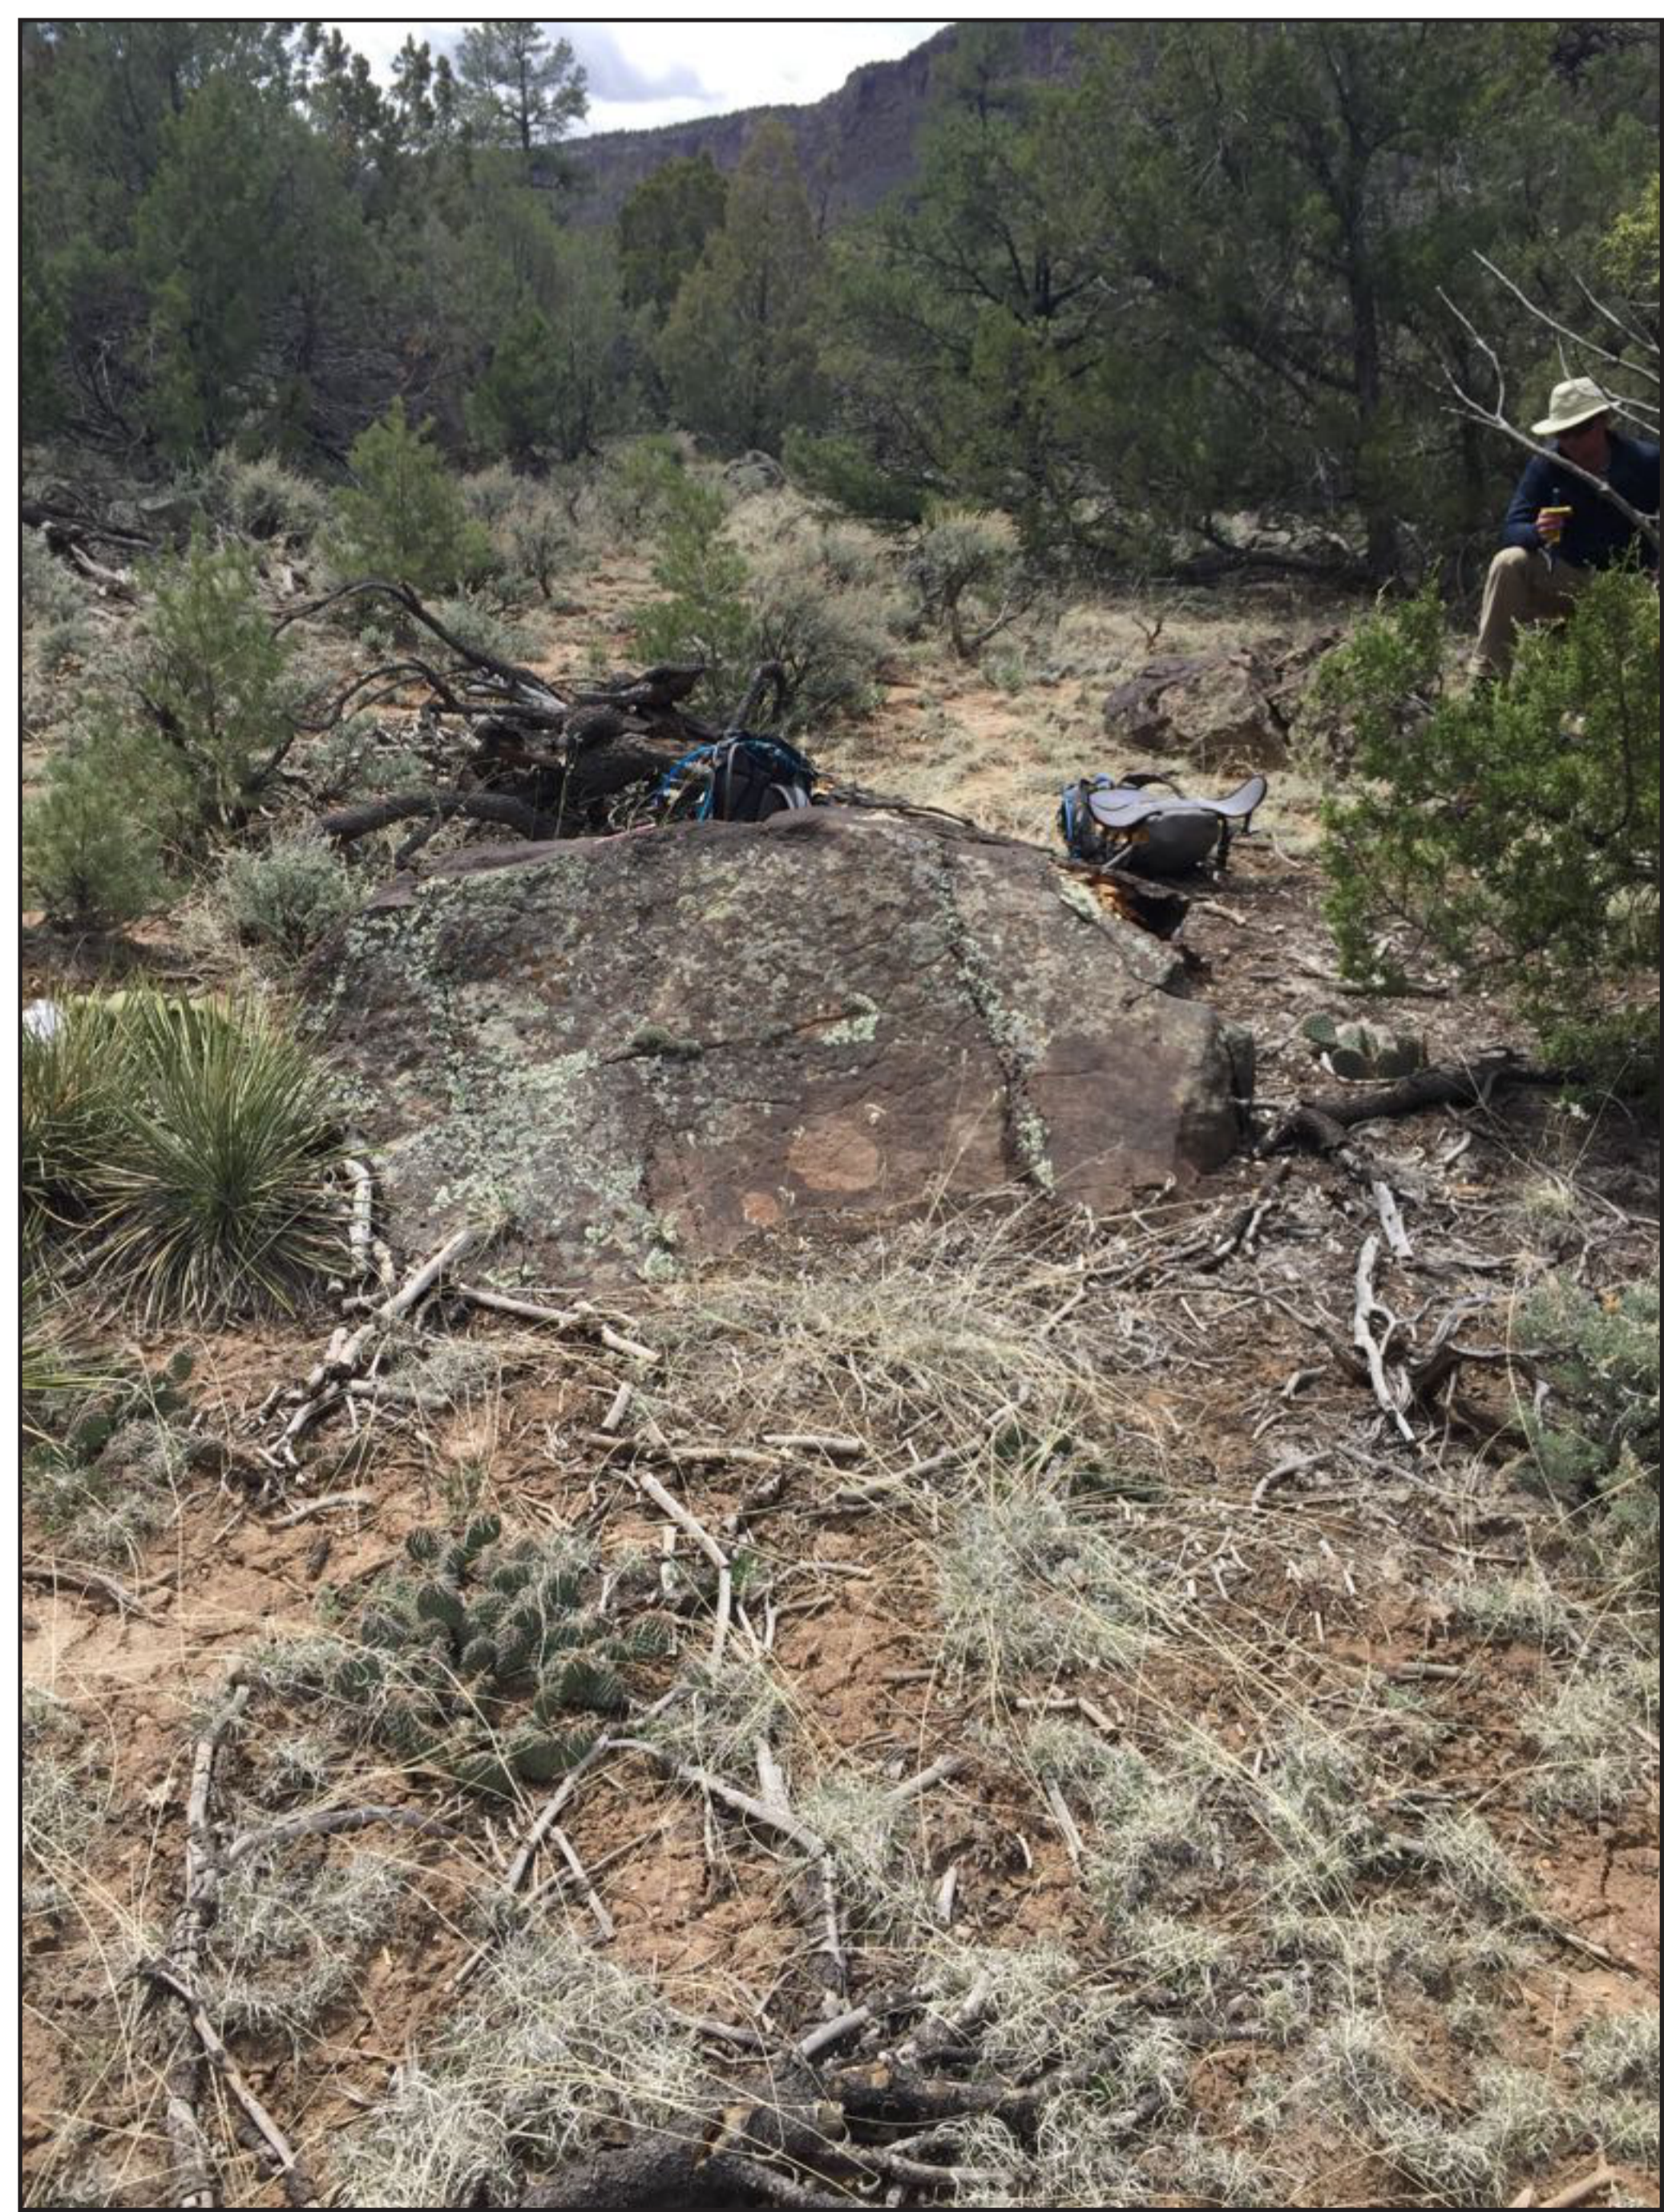

Supplement: Supplementary file 1 [file 22411620 › S3.pdf]

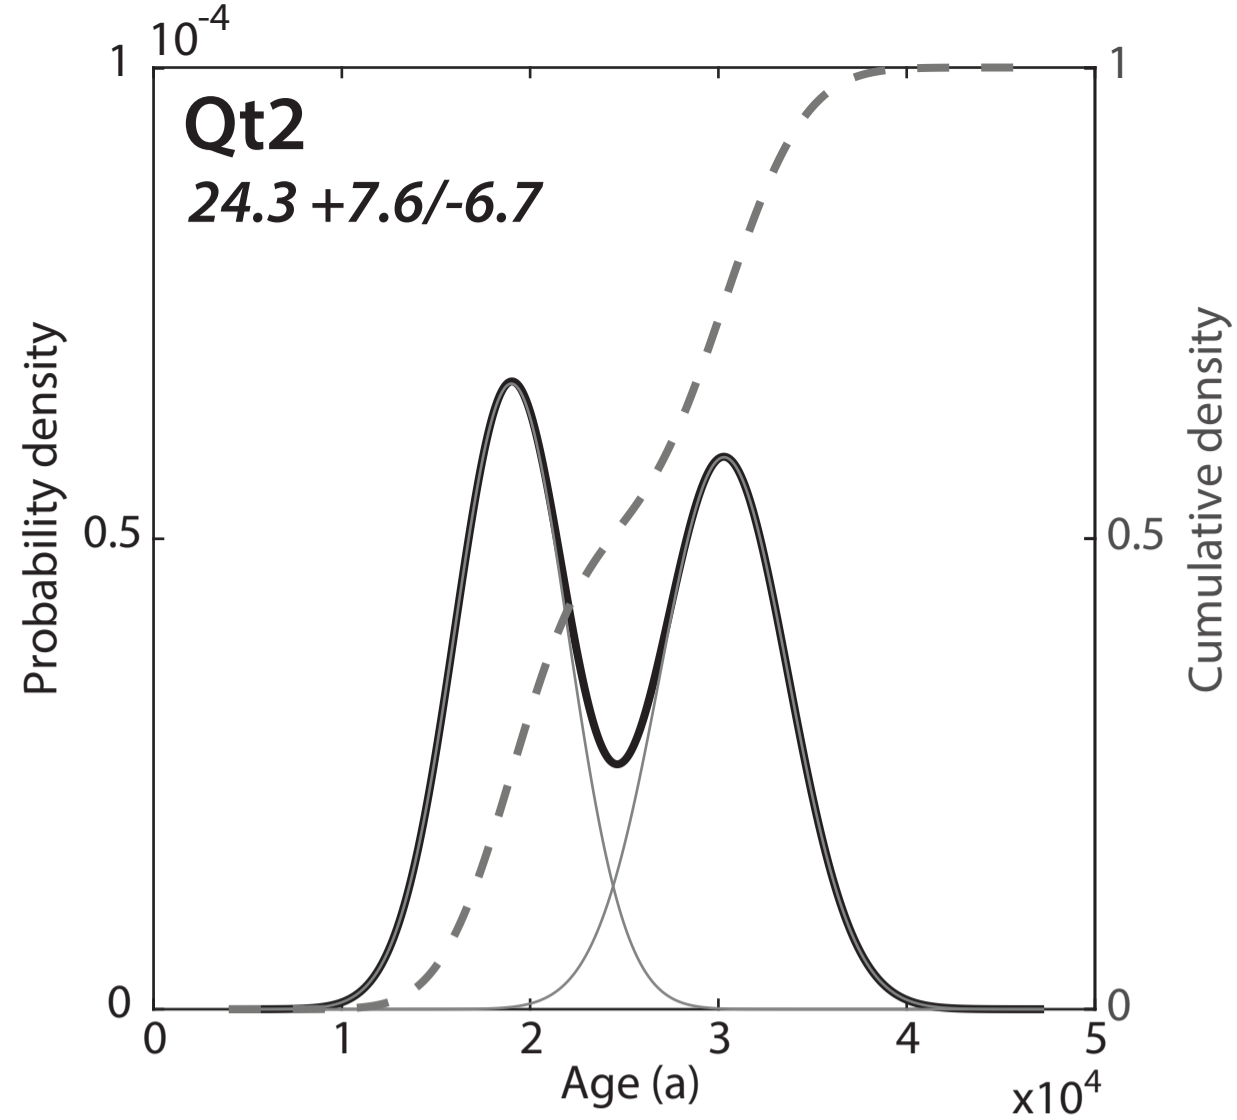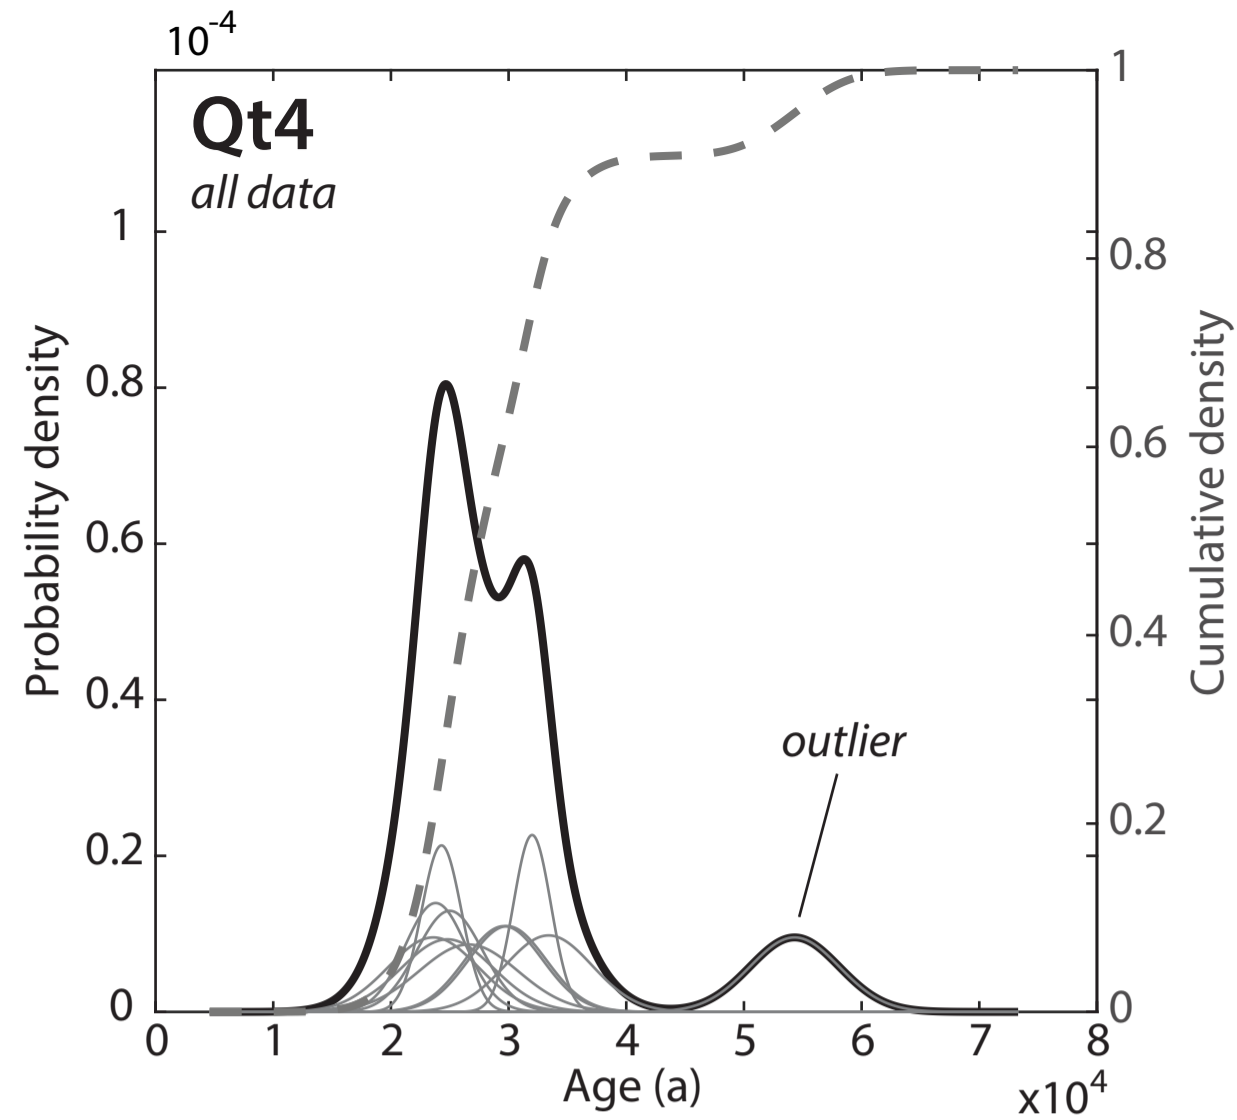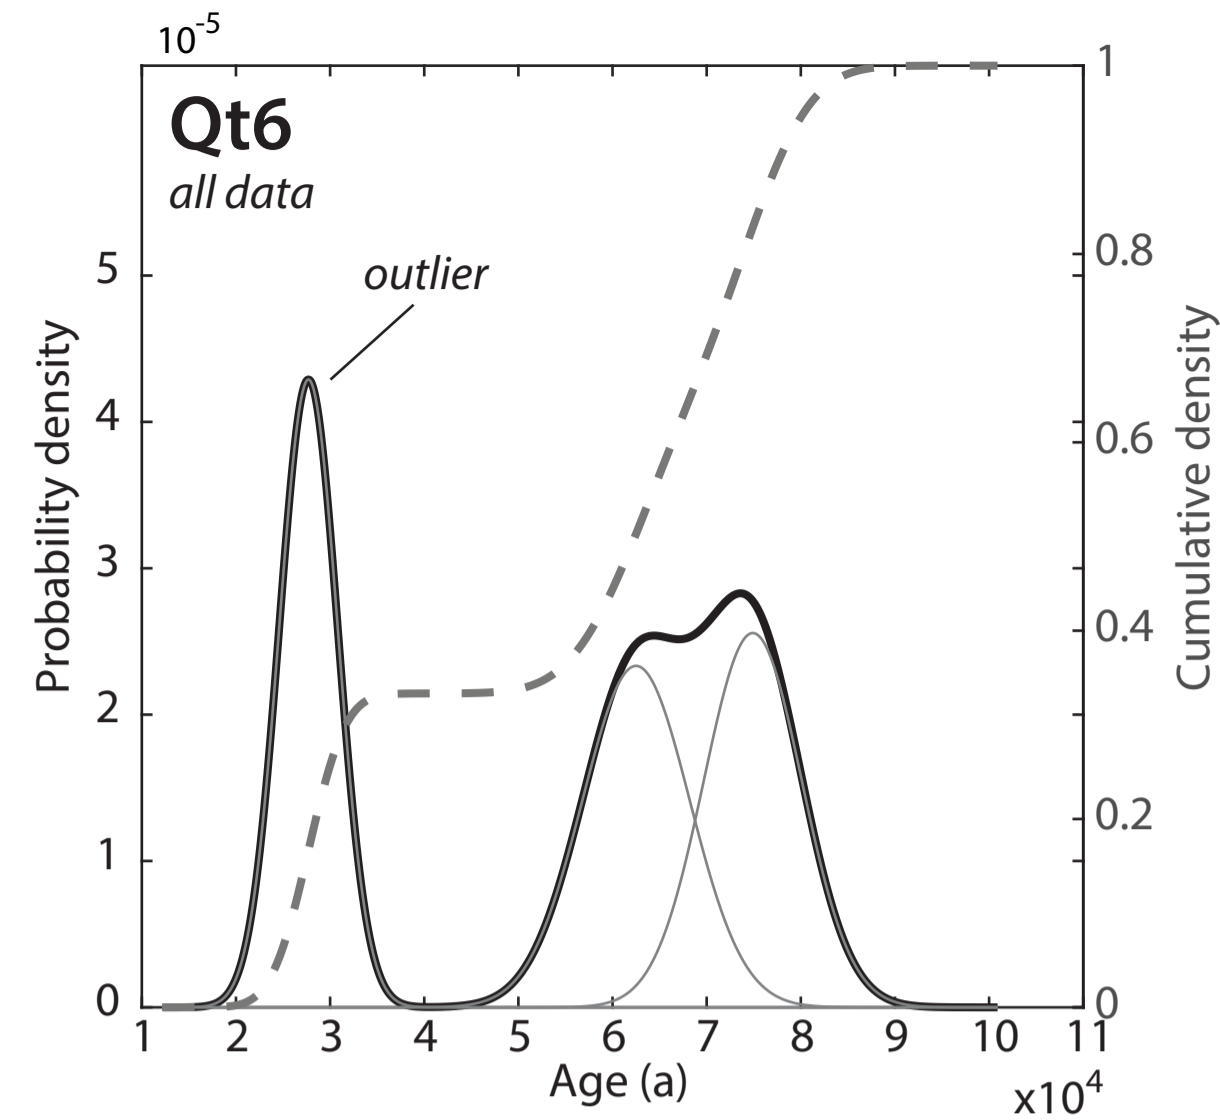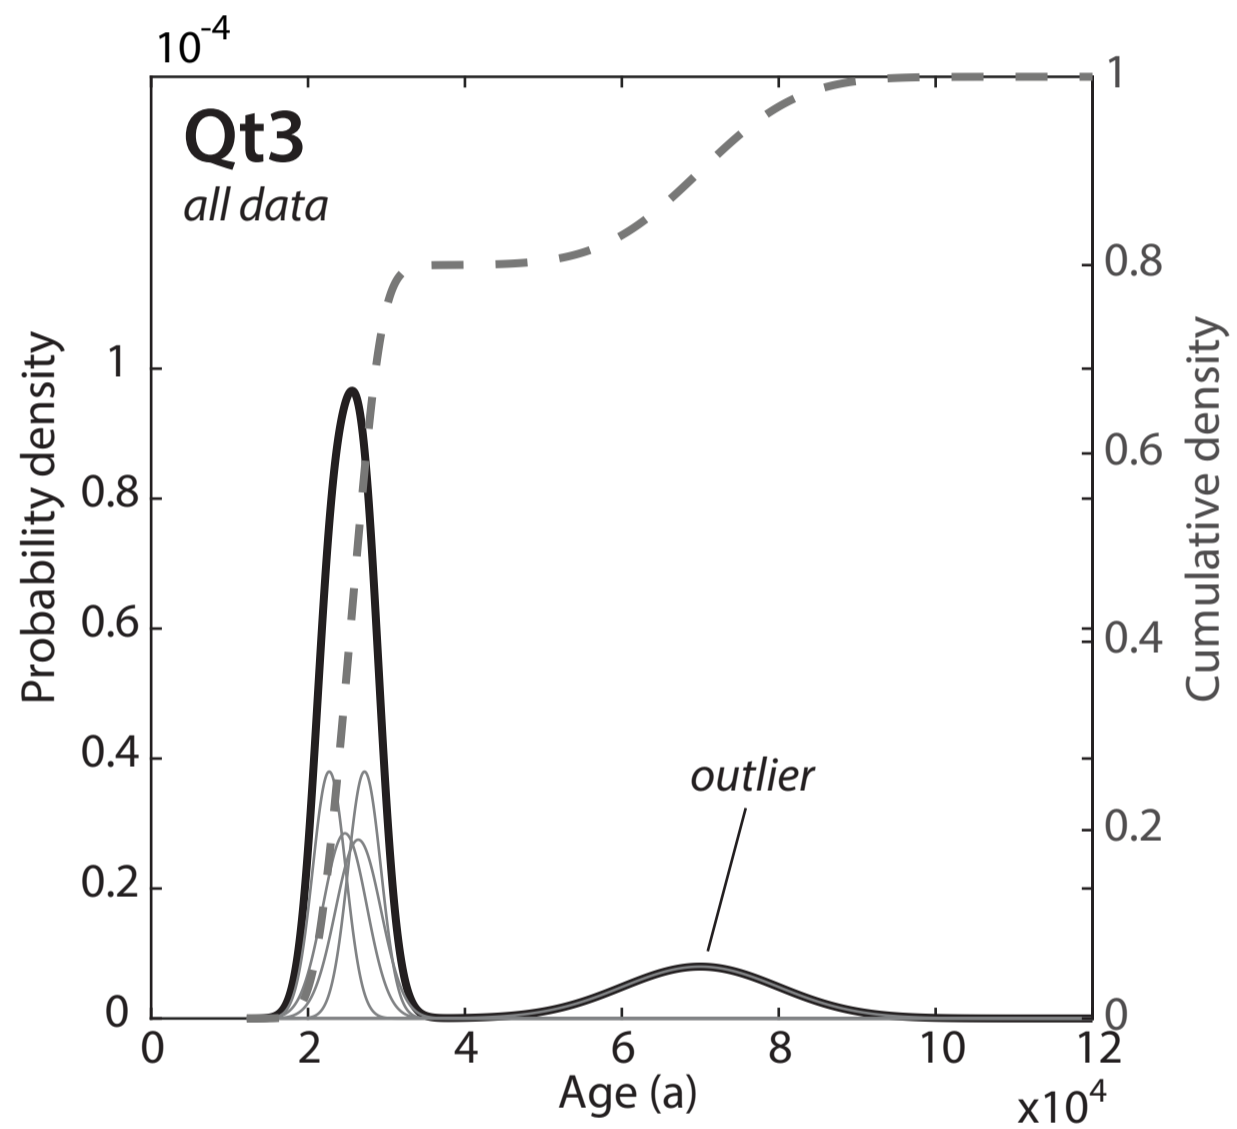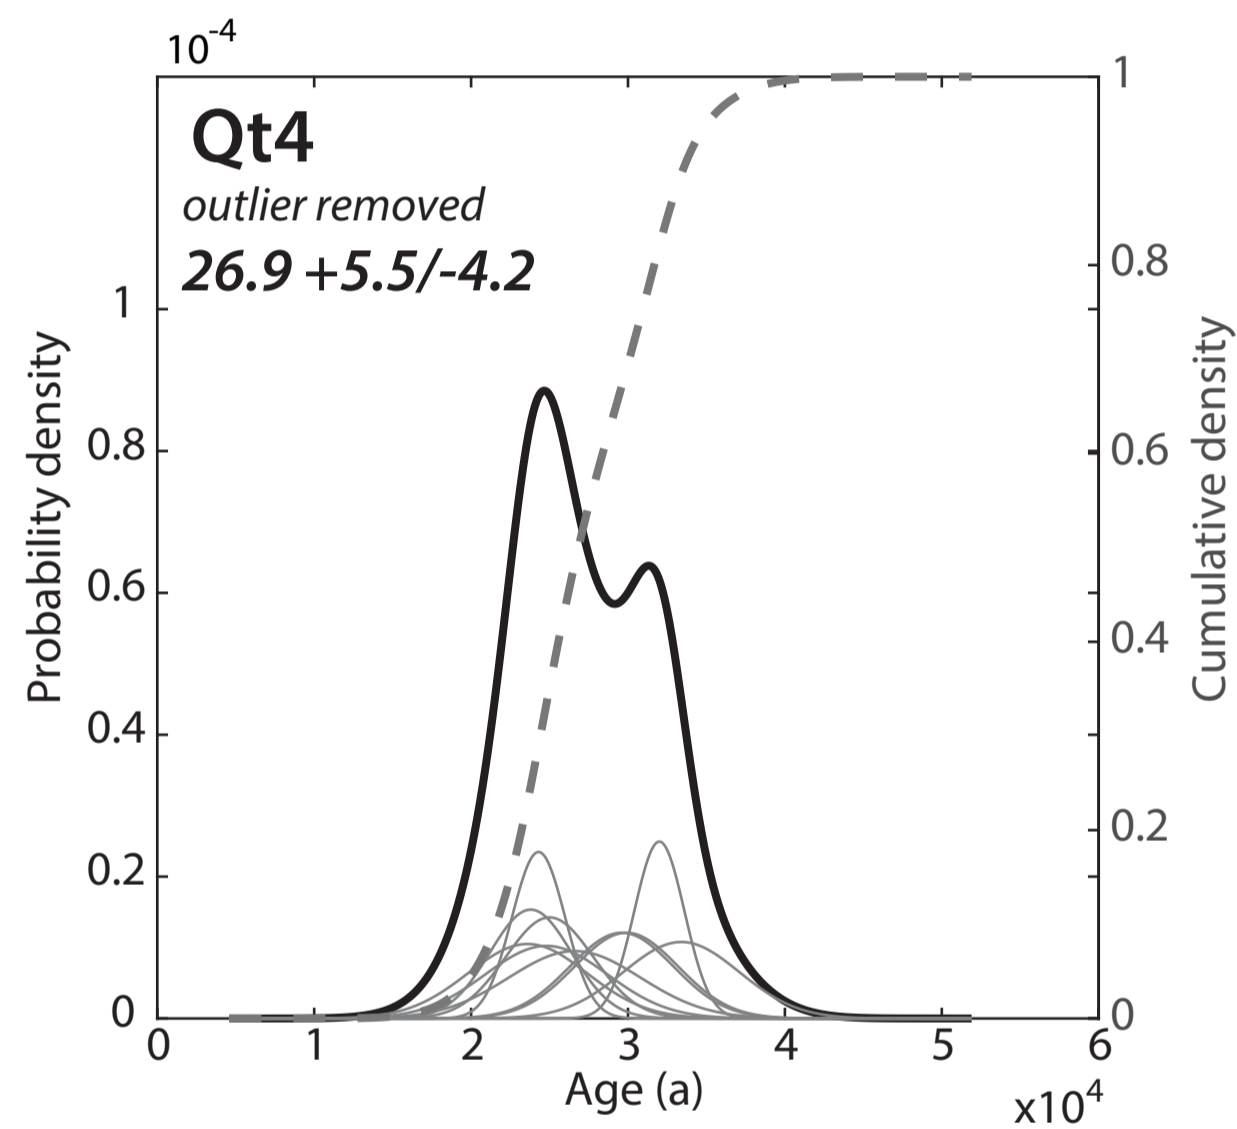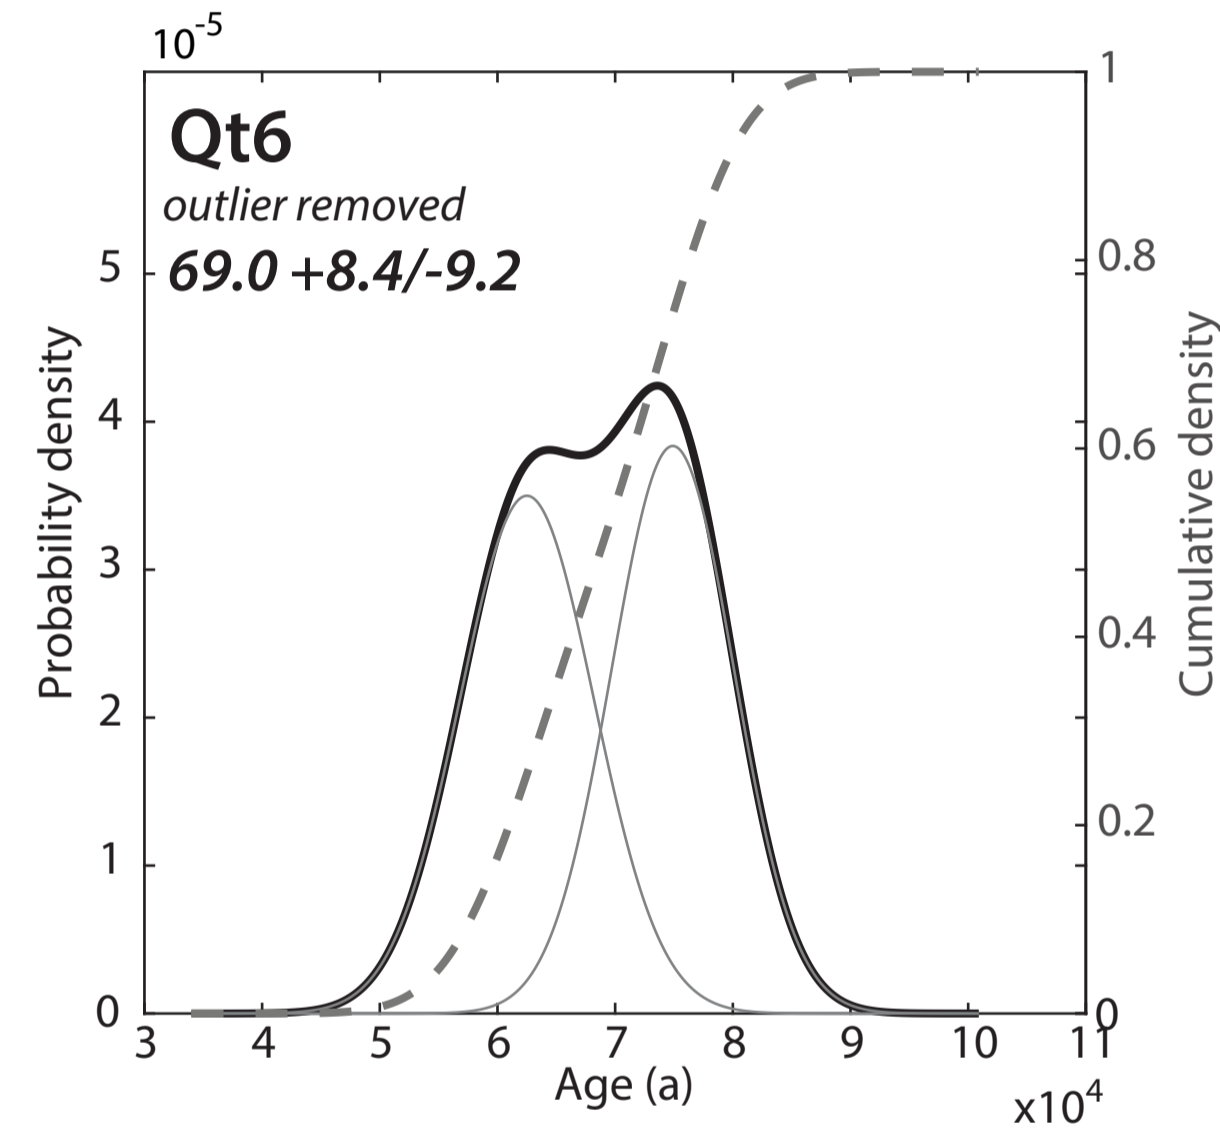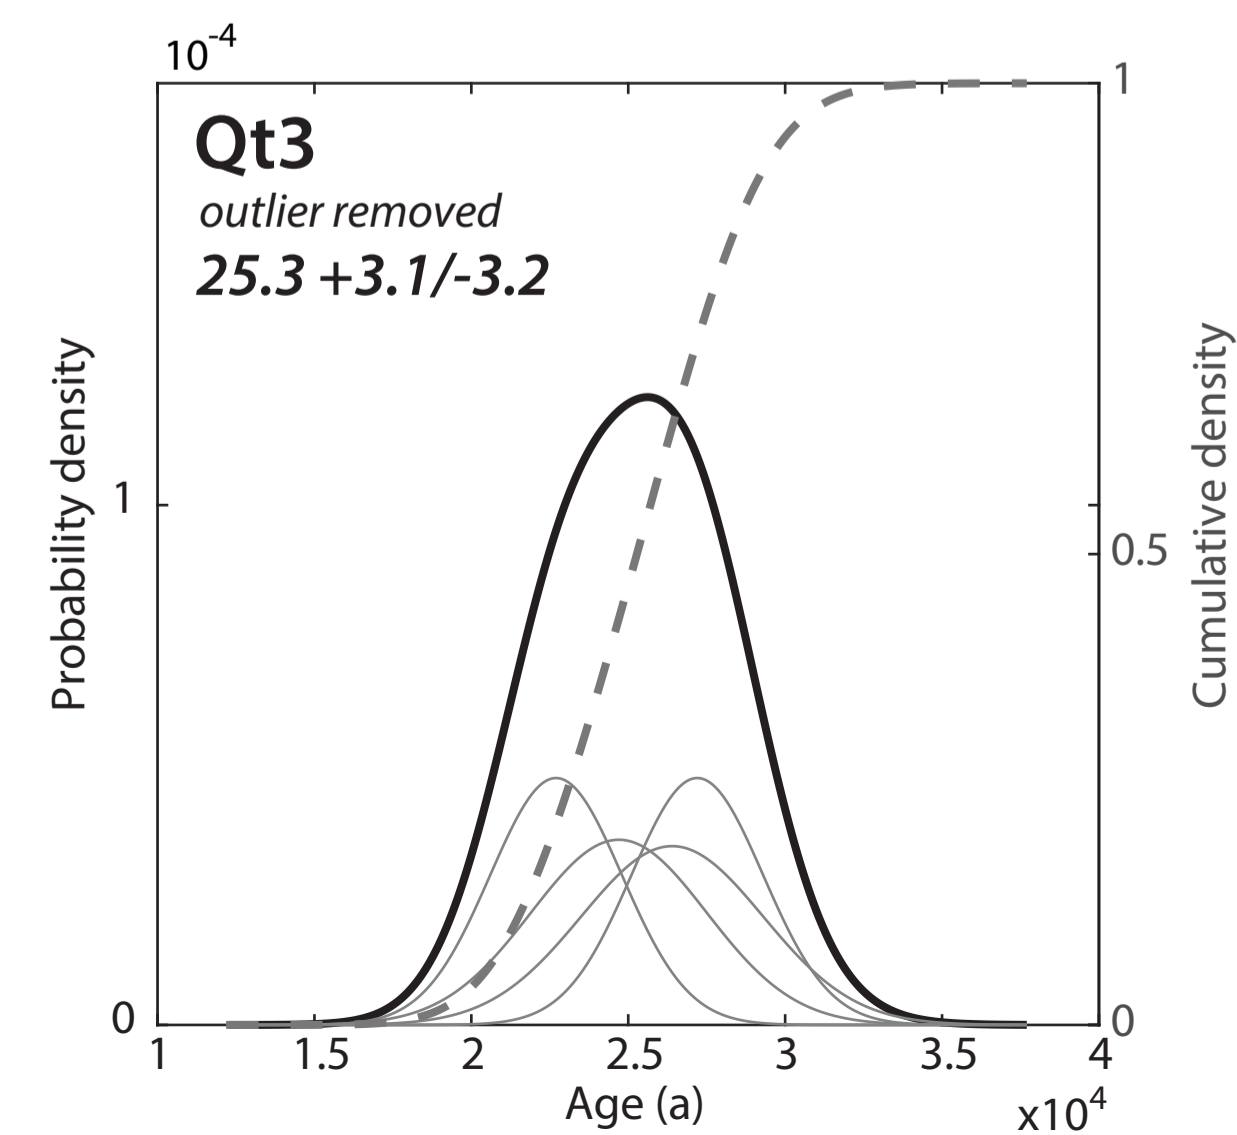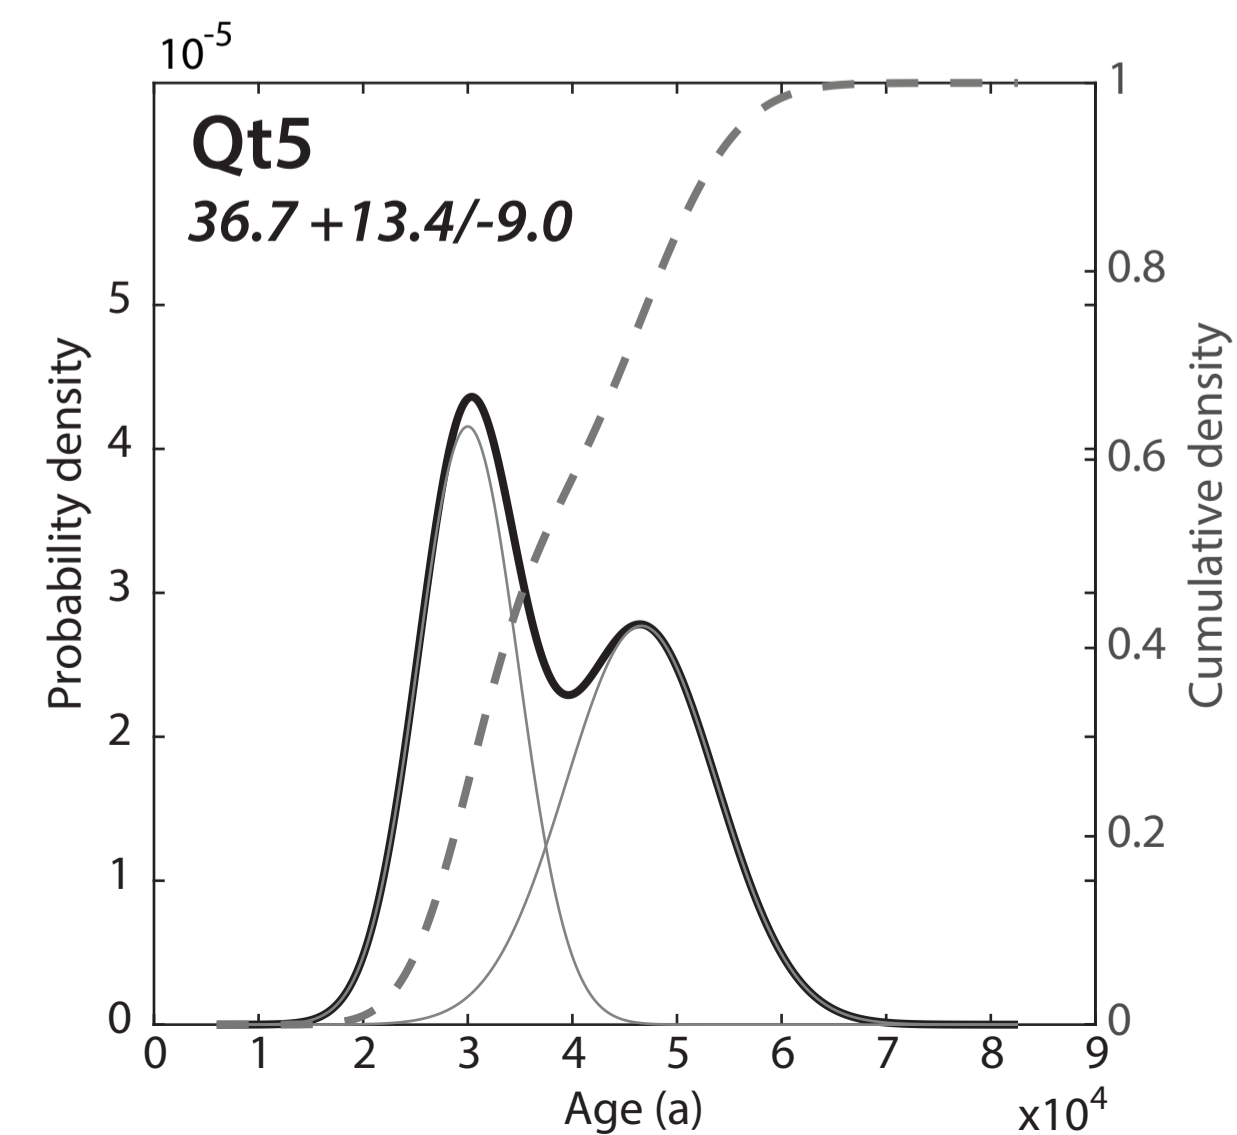

Supplement: Supplementary file 1 [file 22411620 › S4.pdf]
